# Supplementary material for: Study protocol for a randomised double-blinded, sham-controlled, prospective, cross-over clinical trial of vagal neuromodulation for pain treatment in patients with chronic pancreatitis
Source: PubMed Central journal article supplement — BMJ Open. 2019 Aug 23;9(7):e029546. doi: 10.1136/bmjopen-2019-029546 (PMC6720238; doi:10.1136/bmjopen-2019-029546), 2019-08-23
Supplement: bmjopen-2019-029546.draft_revisions.pdf [file bmjopen-2019-029546.draft_revisions.pdf]

# BMJ Open

BMJ Open is committed to open peer review. As part of this commitment we make the peer review history of every article we publish publicly available.

When an article is published we post the peer reviewers' comments and the authors' responses online. We also post the versions of the paper that were used during peer review. These are the versions that the peer review comments apply to.

The versions of the paper that follow are the versions that were submitted during the peer review process. They are not the versions of record or the final published versions. They should not be cited or distributed as the published version of this manuscript.

BMJ Open is an open access journal and the full, final, typeset and author-corrected version of record of the manuscript is available on our site with no access controls, subscription charges or pay-per-view fees (<http://bmjopen.bmj.com>).

If you have any questions on BMJ Open's open peer review process please email [info.bmjopen@bmj.com](mailto:info.bmjopen@bmj.com)

# BMJ Open

## Study protocol for a randomised double-blinded, sham-controlled, prospective, cross-over clinical trial of vagal neuromodulation for pain treatment in patients with chronic pancreatitis

|                               |                                                                                                                                                                                                                                                                                                                                                                                                                                                                                                                                                                                                                                                                                                                                                                                                                                                                                             |
|-------------------------------|---------------------------------------------------------------------------------------------------------------------------------------------------------------------------------------------------------------------------------------------------------------------------------------------------------------------------------------------------------------------------------------------------------------------------------------------------------------------------------------------------------------------------------------------------------------------------------------------------------------------------------------------------------------------------------------------------------------------------------------------------------------------------------------------------------------------------------------------------------------------------------------------|
| Journal:                      | <i>BMJ Open</i>                                                                                                                                                                                                                                                                                                                                                                                                                                                                                                                                                                                                                                                                                                                                                                                                                                                                             |
| Manuscript ID                 | bmjopen-2019-029546                                                                                                                                                                                                                                                                                                                                                                                                                                                                                                                                                                                                                                                                                                                                                                                                                                                                         |
| Article Type:                 | Protocol                                                                                                                                                                                                                                                                                                                                                                                                                                                                                                                                                                                                                                                                                                                                                                                                                                                                                    |
| Date Submitted by the Author: | 31-Jan-2019                                                                                                                                                                                                                                                                                                                                                                                                                                                                                                                                                                                                                                                                                                                                                                                                                                                                                 |
| Complete List of Authors:     | Muthulingam, Janusiya Anajan; Aalborg University Hospital , Mech-Sense, Department of Radiology; Aalborg University, Department of Clinical Medicine<br>Olesen, Søren; Aalborg University Hospital, Mech-Sense, Department of Gastroenterology and Hepatology; Aalborg University, Department of Clinical Medicine<br>Hansen, Tine; Aalborg University Hospital, Denmark, Mech-Sense, Department of Radiology; Aalborg University, Department of Clinical Medicine<br>Brock, Christina; Aalborg University, Department of Clinical Medicine; Aalborg University Hospital<br>Drewes, Asbjørn; Mech-Sense, Department of Gastroenterology and Hepatology, Aalborg University Hospital, ; Department of Clinical Medicine, Aalborg University,<br>Frøkjær, Jens Brøndum; Mech-Sense, Department of Radiology, Aalborg University Hospital; Aalborg University, Department of Clinical Medicine |
| Keywords:                     | Vagal nerve, Viscera, Chronic pancreatitis, Clinical trials < THERAPEUTICS, PAIN MANAGEMENT                                                                                                                                                                                                                                                                                                                                                                                                                                                                                                                                                                                                                                                                                                                                                                                                 |
|                               |                                                                                                                                                                                                                                                                                                                                                                                                                                                                                                                                                                                                                                                                                                                                                                                                                                                                                             |

SCHOLARONE™  
Manuscripts

1  
2  
3  
4  
5 1 **Study protocol for a randomised double-blinded, sham-controlled,**  
6  
7 2 **prospective, cross-over clinical trial of vagal neuromodulation for pain**  
8  
9 3 **treatment in patients with chronic pancreatitis**  
10  
11  
12 4

13  
14 5 Janusiya Anajan Muthulingam<sup>1,2</sup>, Søren Schou Olesen<sup>2,3</sup>, Tine Maria Hansen<sup>1,2</sup>, Christina Brock<sup>2,4</sup>, Asbjørn  
15 6 Mohr Drewes<sup>2,3</sup> and Jens Brøndum Frøkjær<sup>1,2</sup>  
16  
17

18 7  
19  
20 8 1 Mech-Sense, Department of Radiology, Aalborg University Hospital, Aalborg, Denmark

21 9 2 Department of Clinical Medicine, Aalborg University, Aalborg, Denmark

22 10 3 Centre for Pancreatic Diseases, Department of Gastroenterology & Hepatology, Aalborg University Hospital,  
23 11 Aalborg, Denmark

24 12 4 Mech-Sense, Department of Gastroenterology & Hepatology, Aalborg University Hospital, Aalborg,  
25 13 Denmark  
26  
27  
28  
29  
30 14

31 15 **Trial registration number:** The study is registered at [www.clinicaltrials.gov](http://www.clinicaltrials.gov): NCT03357029

32 16 **Protocol version:** Protocol version 6, 13<sup>th</sup> of September 2017.

33 17 **Funding:** The study is conducted as a sponsor-investigator initiated study with financial support from  
34 18 Independent Research Fund Denmark (DFR – 7016-00073).  
35

36 19 **Study Sponsor-investigator and corresponding author:** Professor Jens Brøndum Frøkjær, MD, PhD

37 20 Mech-Sense, Department of Radiology

38 21 Aalborg University Hospital

39 22 P.O. Box 365, DK-9100 Aalborg, Denmark

40 23 Telephone: +45 97665105

41 24 E-mail: [jebf@rn.dk](mailto:jebf@rn.dk)  
42  
43  
44  
45  
46

47 25 **Contributors:** JBF, JM, SSO, TMH, CB and AMD conceived and designed the study and participated in  
48 26 logistical planning of the study. JM drafted the initial version of the manuscript and is collecting the data. All  
49 27 authors made significant contributions to the development and conceptualization of the protocol. All authors  
50 28 reviewed the draft versions of the manuscript and have read and approved the final manuscript.  
51

52 29 **Competing interests:** None

53 30 **Word count:** Abstract: 242 words; main text: 3874 words; Figures 3; table 1; References 44  
54  
55  
56  
57 31  
58  
59 32  
60

**Abstract**

**Introduction:** The management of chronic pancreatitis (CP) is challenging and requires a personalized approach focused on the individual patient's main symptoms. Abdominal pain is the most prominent symptom in CP, where central pain mechanisms, including sensitization and impaired pain modulation, often are involved. Recent clinical studies suggest that vagal nerve stimulation (VNS) induce analgesic effects through modulation of central pain pathways. This study aims to investigate the effect of two-weeks transcutaneous VNS (t-VNS) on clinical pain in CP patients, in comparison to the effect of sham treatment.

**Methods and analysis:** Twenty-one CP patients will be enrolled in this randomized, double-blinded, single-centre, sham-controlled, cross-over study. The study has two treatment periods: A two-week active t-VNS using GammaCore® device and a two-week treatment with a sham device. During both treatment periods, the patients are instructed to self-administer VNS bilaterally to the cervical vagal area, three times per day. Treatment periods will be separated by two weeks. During the study period patients will record their daily pain experience in a diary (primary clinical endpoint). In addition, patients will complete questionnaires, undergo brain magnetic resonance imaging (MRI) and quantitative sensory testing before and after the two treatments to investigate mechanisms underlying VNS effects. The data will be analysed using the principle of intention-to-treat.

**Ethics and dissemination:** The regional Ethics committee has approved the study: N-20170023. Results of the trial will be submitted for publication in peer-reviewed journals.

**Trial registration:** The study is registered at [www.clinicaltrials.gov](http://www.clinicaltrials.gov): NCT03357029

**Key words:** Vagal nerve; Viscera; Pain; Chronic pancreatitis; Clinical trials

1  
2  
3  
4  
5  
6  
7  
8  
9  
10  
11  
12  
13  
14  
15  
16  
17  
18  
19  
20  
21  
22  
23  
24  
25  
26  
27  
28  
29  
30  
31  
32  
33  
34  
35  
36  
37  
38  
39  
40  
41  
42  
43  
44  
45  
46  
47  
48  
49  
50  
51  
52  
53  
54  
55  
56  
57  
58  
59  
60**Strengths and limitations of the study:**

- 55 • This is the first study to examine the analgesic effect of transcutaneous vagal nerve stimulation (t-VNS) in chronic pancreatitis patients with abdominal pain.
- 57 • A randomized double-blinded, sham-controlled, prospective cross-over design will be used with both clinical and experimental outcomes, which allow for exploration of the mechanisms underlying putative clinical effects.
- 60 • The study investigates the effect of two weeks of t-VNS treatment; hence, further studies are needed to explore long-term effects.
- 62 • The single-centre design may limit generalizability of the study results.

For peer review only

## 63 **INTRODUCTION**

64 Chronic pancreatitis (CP) is a disease characterized by progressive pancreatic inflammation and fibrosis,  
65 resulting in damage to and loss of exocrine (acinar), endocrine (islet cells), and ductal cells<sup>1</sup>. Chronic  
66 abdominal pain is the dominating symptom in CP and is present in up to 70% of patients<sup>2</sup>. Pain is associated  
67 with reduced quality of life, increased hospitalization frequencies and thus a significant socioeconomic  
68 burden<sup>3</sup>.

69 The aetiology of pain in CP is increasingly better understood and often involves multiple mechanisms in the  
70 individual patient. In addition to local pathology in the pancreatic gland and its surrounding tissues, central  
71 pain pathways undergo neuroplastic changes during the course of CP. These involve sensitization of central  
72 pain pathways, functional and structural reorganization of the brain as well as impaired efficacy of endogenous  
73 pain modulatory pathways. These neural abnormalities can be targeted by different pharmacological therapies,  
74 but their effect is often limited and associated with significant side-effects in many patients. This has led to an  
75 increased interest in complementary treatment modalities for pain in patients with CP. In a model of  
76 oesophageal hyperalgesia, we have shown that physiological deep breathing enhanced vagal tone, which in  
77 response increased the pain detection threshold<sup>4</sup>. In addition, this effect was abolished by atropine  
78 administration thereby proving that enhanced parasympathetic tone leads to prevention of oesophageal pain  
79 hypersensitivity<sup>4</sup>. Also, we have previously shown an improved gastrointestinal motility and decreased pain  
80 sensitivity following non-invasive VNS of the auricular branch of the vagal nerve in conjunction with a deep-  
81 breathing approach in healthy subjects<sup>5</sup>. Another non-pharmacological treatment modality is transcutaneous  
82 vagal nerve stimulation (t-VNS), in which short bursts of electrical energy are directed onto the vagal nerve at  
83 the neck<sup>6</sup> (Figure 1). T-VNS has been shown to induce analgesic<sup>7,8</sup> and anti-inflammatory effects in healthy  
84 individuals<sup>9</sup> and different diseases. Also, the non-pharmacological treatment is FDA-approved for the  
85 preventive treatment of cluster headache and migraine<sup>10</sup>.

86 This study aims to examine the analgesic effect of a two-week t-VNS in patients with CP and to explore the  
87 underlying analgesic mechanisms using advanced neuroimaging techniques and quantitative sensory testing  
88 (QST). We hypothesized that two weeks t-VNS treatment will induce clinically relevant pain relief compared  
89 to sham treatment, and that these effects are mediated via modulation of central pain pathways. To answer the  
90 overall study aims, we have two clinical and two experimental objectives:

- 91 1) The primary clinical objective is to assess the effect of t-VNS on the daily pain experience documented in  
92 a diary.
- 93 2) Secondary clinical objectives are to document changes in quality of life and daily functioning.
- 94 3) The primary experimental objective is to assess the effect of t-VNS on A) resting state brain function  
95 assessed by magnetic resonance imaging (MRI), and B) brain metabolites assessed by magnetic resonance  
96 spectroscopy.

1  
2  
3  
4  
5  
6  
7  
8  
9  
10  
11  
12  
13  
14  
15  
16  
17  
18  
19  
20  
21  
22  
23  
24  
25  
26  
27  
28  
29  
30  
31  
32  
33  
34  
35  
36  
37  
38  
39  
40  
41  
42  
43  
44  
45  
46  
47  
48  
49  
50  
51  
52  
53  
54  
55  
56  
57  
58  
59  
60

97 4) Secondary experimental objectives are to assess the effect of t-VNS on A) experimental pain stimuli  
98 documented by QST, B) cardiac vagal tone and C) pro-inflammatory cytokine profiles obtained from  
99 blood samples.

For peer review only

## **METHODS AND ANALYSES:**

### **Study design**

Randomised, single-centre, double-blinded, prospective, sham-controlled, cross-over study. The study was approved by the North Denmark Region Committee on Health Research Ethics with the protocol number N-20170023 and has been registered with ClinicalTrials.gov (NCT03357029). The trial will be performed at Aalborg University Hospital and will be reported according to the Consolidated Standards of Reporting Trials (CONSORT)<sup>11</sup>. The study protocol follows the Standard Protocol Items: Recommendations for Interval Trials (SPIRIT) statement<sup>12</sup>.

All patients undertake the t-VNS treatment using an active GammaCore-S, 300 treatments (10009-00603) device (ElectroCore LLC; Basking Ridge, NJ, USA) and sham treatment using a sham-device (10009-00603 P) which is identical in appearance GammaCore.

Half of the patients will be randomized to start with two-week t-VNS treatment, followed by a two-week washout period. Then, this group will be reallocated to sham treatment. The other half of patients will do the study periods in opposite order (sham treatment followed by t-VNS treatment). The two-week washout period has been used in previous studies of trans-cranial neuromodulation<sup>13</sup> and was shown to be sufficient to reset the effects of neuromodulation<sup>14</sup>. Each patient will be scheduled for four identical hospital visits (before and after each treatment period). The visits consist of 1) Fulfilment of questionnaires, 2) Collection of blood samples, 3) brain MRI scan, 4) QST, and 5) assessment of CVT (Figure 2).

### **Study participants**

Patients will be recruited via personal correspondence and during visits at the outpatient clinic. Patients who agree to participate in the study and fill in an informed consent will be invited to participate in the study. A screening session and physical examination prior to inclusion will be conducted by a medical doctor including relevant medical and medication history and screening against the eligibility criteria.

### **Inclusion criteria and exclusion criteria**

Patients from the age of 18 years will be included in the study. They will have a clinical diagnosis of CP based on the Mayo clinical diagnostic criteria<sup>15</sup>. The patients must suffer from chronic abdominal pain characteristics for CP, meet the criteria for chronic pain (pain  $\geq$  3 days per week for at least 3 months) and must consider their pain as insufficiently treated with their prescribed analgesic treatment. Additionally, the patients must be willing and able to comply with the scheduled visits, treatment plan, laboratory tests, and other study procedures. Finally, the patient must sign the informed consent and power of attorney document.



1  
2  
3  
4  
5  
6  
7  
8  
9  
10  
11  
12  
13  
14  
15  
16  
17  
18  
19  
20  
21  
22  
23  
24  
25  
26  
27  
28  
29  
30  
31  
32  
33  
34  
35  
36  
37  
38  
39  
40  
41  
42  
43  
44  
45  
46  
47  
48  
49  
50  
51  
52  
53  
54  
55  
56  
57  
58  
59  
60

Patients will be excluded if they have any clinically significant abnormalities that may increase the risk associated with trial participation or may interfere with the interpretation of the trial results. Also, patients with alcohol and illegal drug dependence patients, cardiovascular diseases, low blood pressure (<100/60mmHg), elevated intracranial pressure will be excluded. Additionally, patients who are participating in another intervention study, patients who are pregnant or intend to become pregnant, and patients who suffer from painful conditions other than CP that make them unable to distinguish the pain associated with CP from chronic pain of other origin will be excluded. Patients will also be excluded if there are any contraindications for MRI (incl. cardiac pacemaker, implantable metallic components, etc.), have known neuropathy, or previous vagal nerve surgery.

Participants can withdraw from the study at any time they may wish. Patients will be withdrawn from the study if they do not meet for the scheduled study visits or miss a treatment period, and if they do not maintain inclusion/exclusion criteria.

### Interventions

Study interventions are t-VNS treatment and sham treatment (Figure 2 & 3).

Patients will be thoroughly instructed to use the device, and when the healthcare providers are confident that the patient is capable to use the device independently, the device will be handed over to the patient. T-VNS is administered by using a handheld device (GammaCore; ElectroCore LLC; Basking Ridge, NJ, USA), which consists of a battery powered portable stimulator with a digitally controlled user-interface that controls the signal amplitude and two gel covered (Sigma gel, Parker Laboratories, NJ, USA) contact electrodes which deliver electrical stimulation to the cervical vagal nerve. One dose corresponds to 120 seconds of t-VNS to the left cervical vagal nerve followed by 120 seconds of t-VNS to the right cervical vagal nerve, with the amplitude of simulation titrated to achieve mild pulling of the ipsilateral oral commissure<sup>16</sup>. The patient self-administers the treatment, using the device at home three times per day (morning, afternoon, and evening) for two weeks. Previous studies with Gamma-Core, have shown that three doses per day have been effective<sup>10,17</sup>.

The stimulation device is positioned anterior to the sternocleidomastoid muscle, over the carotid artery as this runs in close proximity with the vagal nerve. The active Gamma-Core device produces a low-voltage electrical signal comprising a 5 kHz sine wave burst lasting for 1 millisecond (five sine waves, each lasting 0.2 millisecond), with such bursts repeated once every 40 milliseconds (25 Hz), generating a 24 V peak voltage and 60 mA peak output current.

To mimic the sensation of the active treatment, the sham-device will provide vibration<sup>18</sup>. The appearance, weight, visual and audible feedback, and user application are identical for the sham and t-VNS devices. However, the sham device produces a low-frequency (0.1 Hz) biphasic signal that does not stimulate the vagal

1  
2  
3  
4 166 nerve or generally cause muscle contractions<sup>19</sup>. Additionally, both devices will display a numeric value  
5  
6 167 between 1 and 40, signifying the intensity of the stimulation. The maximum intensity per stimulation is 40 for  
7  
8 168 both devices (Figure 1).

9  
10 169 Compliance will be assessed by reading the remaining doses displayed at the device after each treatment  
11 170 period. Additionally, the patients will be asked to keep a record of the stimulation intensity of the doses applied  
12  
13 171 at each stimulation. In addition, questions on compliance will be asked after each treatment period. Finally,  
14  
15 172 adherence will be recorded by patients' diary.

16  
17 173 During the study periods the patient will continue their standard care, without changes in their current pain  
18 174 treatment.

### 21 175 22 176 **Randomization, sequence generation and allocation concealment**

23  
24 177 Once eligibility and consent have been approved and completed, randomization will occur using a  
25  
26 178 randomization list generated by an automatic web-based randomization program. Patients will be randomly  
27  
28 179 assigned to VNS/sham or sham/VNS using block randomisation, allowing seven patients at the time to be  
29 180 randomised in equal proportions for the order of active t-VNS or sham stimulation. The randomization order  
30  
31 181 will be kept in closed envelopes; therefore, patients will get their assignment according to the order of entrance  
32 182 in the study. This process will be carried out by a member of the research team who is not involved in the  
33  
34 183 recruitment process or conduction of the study.

35  
36 184 An unblinded researcher will be involved in delivering the medical device according to the randomisation  
37  
38 185 schedule. The sequence will follow a 1:1 sequential design, in a double-blinded fashion. Additionally, the  
39 186 outcome assessor (data analyst) will be blinded during the statistical analyses of primary experimental  
40  
41 187 outcomes. A series of numbered, sealed, envelopes will be used to ensure concealed allocation.

### 43 188 44 45 189 **Blinding**

46  
47 190 Both, active and sham devices are labelled with a serial number and not outwardly identified as active or sham.  
48 191 All researchers involved in the data collection and MRI analysis will be blinded to the treatment allocation  
49 192 group until after analyses are performed at the completion of the trial. Additionally, all patients are blinded,  
50  
51 193 and they do not know that the sham treatment is an inactive treatment. Particularly, patients will be informed  
52 194 that they have to undergo two different treatments, and the purpose of this study is to investigate the most  
53  
54 195 effective treatment.

1  
2  
3  
4 196 Manufacturing and preparation of the medical devices are handled by an external good manufacturing practice-  
5  
6 197 accredited facility (ElectroCore). As the patients do not know that the sham treatment is an inactive treatment,  
7  
8 198 we will not be able to ask the patient “do you think you received active or inactive treatment?”, thus we will  
9  
9 199 not be able assess and determine if the blinding was effective.  
10

11 200 Unblinding is only permissible if a patient experiences any serious adverse events and that the  
12  
13 201 investigator/doctor judge that it is essential to know the treatment allocation in order to treat the patient  
14  
15 202 appropriately.  
16

### 17 203 18 19 204 **Primary clinical outcome measures**

20  
21 205 The primary clinical efficacy parameter to be evaluated is 30% pain relief. This is assessed as changes in the  
22  
23 206 daily experience of pain, which will be measured using a patient pain diary based on the numeric rating scale  
24  
25 207 (NRS) (1 = no pain, 10 = worst pain imaginable). Patients will be asked to score daily pain levels in the diary  
26  
27 208 for eight weeks (including one week before the first treatment period and one week after the last study period,  
28  
28 209 Figure 2 and Figure 3), with one NRS value for the average pain over the previous 24 hours and one NRS  
29  
29 210 value for the worst pain over the previous 24 hours.  
30

### 31 211 32 33 212 **Secondary clinical outcome measures**

34  
35  
36 213 Quality of life questionnaire, C30, version 3.0 (QoLQ-C30)<sup>20</sup>, the brief pain inventory – short form (BPI-SF)  
37  
38 214 questionnaire<sup>21</sup>, and Patient Global Impression of Changes<sup>22</sup> questionnaire (PGIC) are secondary clinical  
39  
39 215 outcomes. Patient will complete QoLQ-C30 and BPI-SF questionnaire before and after each treatment period,  
40  
41 216 while the PGIC questionnaire will only be fulfilled after the treatment periods. The QoLQ-C30 questionnaire  
42  
42 217 is composed of both multi-item scales and single-item measures. These include five functional scales, three  
43  
44 218 symptom scales, a global health status, and six single items. The BPI-SF questionnaire rapidly assess the  
45  
45 219 severity of pain and its impact on daily functioning. Finally, the PGIC questionnaire evaluates all aspects of  
46  
47 220 patients' health and assess if there has been an improvement or decline in the overall clinical status.  
48

### 49 221 50 51 222 **Primary experimental outcome measures**

52  
53 223 Resting state functional MRI will be employed to detect brain activity and functional connectivity changes  
54  
55 224 based on BOLD signals before and after treatment of each patient. Additionally, magnetic resonance  
56  
57 225 spectroscopy in anterior cingulate cortex, prefrontal cortex, parietal, and insula will also be performed in order  
58  
58 226 to investigate changes in brain metabolites before and after each treatment.  
59  
60

1  
2  
3  
4 227 MRI data will be acquired on a 3 Tesla MR scanner (Signa HDxt, General Electric, Milwaukee, WI, USA)  
5  
6 228 equipped with an 8 channel standard head coil. Scan time for a structural scan will be 5½ minutes. Following  
7  
8 229 parameters will be used for the structural scan: 150 slices, FOV 250 mm, echo time 3.6 millisecond, repetition  
9 230 time 9.0 millisecond, flip angle 14°, resolution 0.78x0.78 mm, matrix size 320x320 mm, slice thickness 1 mm,  
10  
11 231 full head coverage, with no gap. Functional scans will be acquired with following parameters: gradient echo,  
12 232 echo planar (Gr-EPI), 192 volumes, 37-40 slices, FOV=240 mm, echo time=30 millisecond, repetition  
13  
14 233 time=2000 millisecond, flip angle=90°, matrix size=64x64, resolution=3.75x3.75 mm, slice thickness 3.8 mm,  
15 234 no gap, axial slices. The scan time for functional MRI will be 6 minutes and 32 seconds. Additionally, MRI  
16  
17 235 spectroscopy will be used to estimate brain metabolites in the anterior cingulate cortex, prefrontal cortex,  
18  
19 236 parietal, and insula. For MRI spectroscopy, single voxel PRESS (Point RESolved Spectroscopy) will be  
20 237 acquired. Following parameters will be used: Echo time=30 millisecond, repetition time=2000 millisecond,  
21  
22 238 scan time will be 5 minutes, and the total number of scans will be 128. Bandwidth will be 5,000 Hz. A  
23 239 20x20x20 mm voxel of interest will be positioned on a sagittal T2-weighted fast spin echo sequence. Repetition  
24  
25 240 time= 4600 millisecond and echo time=102 millisecond, matrix 384x256, slice thickness 3 mm, gap 0.3 mm),  
26 241 in the midline in the ACC with the inferior border along the anterior-posterior commissure line.  
27  
28  
29 242

### 31 243 **Secondary experimental outcome measures**

32  
33 244 Secondary outcomes are changes in QST, CVT and pro-inflammatory cytokine profiles.

34  
35 245 QST includes temporal summation<sup>23</sup>, pressure pain thresholds<sup>23,24</sup> and conditioned pain modulation (CPM)<sup>25</sup>.  
36  
37 246 Temporal summation demonstrates an increase perception of pain to repetitive pain stimuli<sup>23</sup>. Temporal  
38  
39 247 summation will be recorded in the dermatome T10 (pancreatic area) and control area (dominant forearm) using  
40 248 the PinPrick stimulator, 256 mN (MRC Systems GmbH Medizintechnische Systeme, Germany).  
41

42 249 The pressure pain threshold and pressure pain tolerance will be determined by pressing an electronic pressure  
43  
44 250 algometer (Somedic AB, Stockholm, Sweden) on specified muscle groups: C5 - clavícula, T10 – dorsum, T10  
45  
46 251 – abdomen, L1 – anterior superior iliac spine, and rectus femoris. Also, pressure pain threshold and pressure  
47 252 pain tolerance will be measured on bone. For the muscle pressure stimulation, the probe has a surface area of  
48  
49 253 1 cm<sup>2</sup>. Pressure will be increased at a rate of 30 kPa/sec until the pressure pain threshold is reached. For the  
50 254 bone pressure stimulation, a probe with 3.1 mm<sup>2</sup> (Aalborg University, Denmark) will be applied.  
51

52  
53 255 CPM is a clinically measurable form of descending pain modulation<sup>25</sup> that can be induced experimentally by  
54 256 a conditioning stimulus (the cold pressor test) and quantified by applying a “test-pain” (pressure stimulation  
55  
56 257 of the right quadriceps musculature) before and after its induction<sup>26</sup>. The patient will lower their dominant  
57 258 hand in cold water (2°C for maximum two minutes). The difference in pressure stimulus intensity (pain  
58  
59 259 threshold) before and after induction of cold pressor pain provides a quantitative index of CPM capacity for  
60

1  
2  
3  
4 260 the individual patient. The techniques used for pressure stimulation and cold pressor test described above will  
5  
6 261 be combined to measure CPM.

7  
8 262 CVT is a beat-to-beat measure of brainstem efferent vagal activity, which is assessed by heart rate variability  
9  
10 263 measurement and reflects the contribution of the vagal nerve to cardiac functioning. In this particular test,  
11 264 changes in R-R interval would be measured non-invasively using eMotion Faros 180 device<sup>27</sup>.

12  
13 265 Blood samples are collected to explore changes in pro-inflammatory cytokines profiles. 26 ml blood is  
14 266 collected, and the following inflammatory state and macrophage markers will be assessed: interferon-G,  
15 266 interleukin-8 (IL-8), IL-10, IL-12p70, IL-13, IL-1b, IL-2, IL-4, IL-6, tumour necrosis factor-  $\alpha$  (TNF- $\alpha$ ),  
16 267  
17 267  
18 268 monocyte chemoattractant protein-1 (MCP-1), and high sensitivity C-reactive protein (hs-CRP).  
19

### 20 269 21 22 23 270 **Statistical power**

24  
25 271 The study is powered to detect a minimal difference between the sham treatment and the active treatment of  
26  
27 272 30% on the average clinical pain score at the end of the two study periods. Based on a standard deviation of  
28 273 40% we determine that a study with 16 patients in a cross-over design is needed, with a power of 80%, and  
29  
30 274 the use of a two-sided significance level of 0.05 (alpha). This calculation (standard deviation) is based on data  
31 275 from a study with CP patients, who received pregabalin treatment, which related to an improvement in clinical  
32  
33 276 measures of the pain score<sup>28</sup>. To allow for a dropout rate of 25%, we will aim to recruit 21 CP patients. The  
34  
35 277 sample size was calculated using statistical software package STATA 15.0 (StataCorp LP, College Station)<sup>29</sup>.  
36  
37 278  
38

### 39 279 **Harms and adverse events**

40  
41 280 We do not anticipate this project causing any harm or discomfort to the patients, and we will ensure that our  
42  
43 281 patients participate in the study voluntarily.  
44  
45 282

46 283 Information about adverse events and serious adverse events will be collected from the date of inclusion and  
47  
48 284 in all following contacts with the study subject throughout the project. Adverse events will be documented on  
49 285 the patient file and on the electronic case report form. All types of adverse events will be notified to the device  
50  
51 286 manufacturer ElectroCore and to the Danish Health Authorities by use of Manufactures Incident Report Form.  
52 287  
53

### 54 288 **Data collection and data management**

55  
56 289 All instruments in the questionnaires are validated<sup>20,21</sup>. Additionally, all data collectors are highly experienced  
57  
58 290 registered research nurses, radiographers, and researchers who have been trained in good clinical practice  
59  
60

(GCP). There will be regular meetings between the data collectors, monitor, principal investigator and other co-researchers involved in the project. All paper protocols will be kept safe and transferred to a computerised database. The questionnaires will be checked for errors and missing data by research staff. Data entries are double-checked against the paper questionnaires.

During trial conduct, the Good Clinical Practice unit (GCP, Aalborg, Denmark) will conduct periodic monitoring of all signed consents at monitoring visits to ensure that the protocol and GCP standards are followed. The monitors may review source documents and medical records to confirm that data recorded on Case Report Form is accurate. Thus, GCP monitoring includes all signed consents, signed power of attorney, and AE.

Criteria for the termination of the trial is, when patients according to the sample size with valid data are recorded. If the study fails to recruit adequate patients according to the sample size by end of 2019, the study will be terminated.

#### **Data analysis**

Both descriptive and analytical statistics will be used in order to compare groups and for analyses of outcomes over time including changes therein. All data will be presented as mean  $\pm$  standard deviation and summarized in frequency tables, unless otherwise indicated. We will use Research Electronic Data Capture (REDCap)<sup>30</sup> to store the data and the statistical software package STATA to perform statistical analysis. We will use mixed ANOVA for the inferential statistic of the parametric data, with Tukey's and/or Bonferroni post hoc tests for the primary clinical endpoints. Significance level will be set as  $\alpha \leq 0.05$ .

The principal analysis of clinical endpoints will be by intention-to-treat, meaning that all randomized patients are included in their initially assigned study arm, regardless of adherence to study protocol. Experimental endpoints will be analysed by per-protocol, meaning that only patients completing the experimental setup are included. The primary endpoints will be compared between the treatment groups.

Analysis of MRI data: We will use standard pre-processing procedures in Statistical Parametric Mapping (SPM) (<http://www.fil.ion.ucl.ac.uk/spm/>) before conducting the statistical analysis. Moreover, we will use a mixed effects design in which within-subject effects between the two treatments (before and after both treatments) responses brain activity and group effects will be modelled. For MR spectroscopy, specific metabolites changes will be assessed in pain related brain regions<sup>31</sup>.

The rest of the data, like demographic data, changes in circulating cytokines, and others, will be used descriptively and as input to regression and mixed model analyses. The final statistical analysis plan, providing

1  
2  
3  
4 324 details of the analysis and presentation of the results will be finalized before initiating any statistical analysis.  
5  
6  
7 325

8 326 **Patient and public involvement**

9  
10 327 The study was designed based on the need for new therapeutic options for CP patients and the literature relating  
11  
12 328 to pain management in chronic pancreatitis, as described in the introduction. The primary outcomes, such as  
13 329 pain scores and MRI brain scans were deliberately chosen in order to assess the potential effect of t-VNS  
14  
15 330 treatment both subjectively (patient-oriented) and objectively. Furthermore, no patients were directly involved  
16  
17 331 in the design, recruitment to or conduct of the study. However, an expert/chief doctor specialized in chronic  
18 332 pancreatitis disease is an associated investigator of the study (SSO). The results and findings gathered from  
19  
20 333 this study will be provided to the patients on request in the form of a written report.

21  
22 334 There was no public involvement in the study design.  
23  
24 335  
25  
26  
27  
28  
29  
30  
31  
32  
33  
34  
35  
36  
37  
38  
39  
40  
41  
42  
43  
44  
45  
46  
47  
48  
49  
50  
51  
52  
53  
54  
55  
56  
57  
58  
59  
60



**DISCUSSION**

To the best of our knowledge, there are no randomized, sham controlled, studies investigating the effect of t-VNS on clinical pain in patients with CP. We expect the study to provide clinical evidence of the analgesic effect of VNS and to elucidate its underlying mechanisms of action. This may pave the road for non-pharmacological treatment of pain associated with CP and the findings of the study may be generalizable to chronic pain conditions *per se*.

Previous studies have shown structural and functional alterations of the CNS in CP patients with abdominal pain<sup>32-36</sup>. The CNS mechanisms may have the ability to recover by targeting treatment at plasticity mechanisms and reorganization of neuronal pathways leading to improvement of clinical symptoms<sup>37</sup>. VNS treatment has emerged promising technique in stimulating neural reorganization and synaptic plasticity in cortical and subcortical networks, leading to modulation of serotonergic and noradrenergic pain inhibitory pathways<sup>38</sup>. Those mechanisms might alter and regenerate the neural connectivity in regions responsible for pain<sup>39-41</sup>. In addition, the vagal nerve serves as an essential transmitter of inflammatory signals in immune-to-neuronal communication<sup>42-44</sup>. Afferent fibers of the vagal nerve relay information from viscera to the nucleus tractus solitaries in the brainstem, where it 'senses' pro-inflammatory cytokines such as IL-1, IL-6, and TNF- $\alpha$ . Information is then projected to the parvocellular zone of the paraventricular nucleus of the hypothalamus, and therefore comparison of functional alterations in the CNS and circulating levels of pro-inflammatory cytokines may provide evidence of an existing association. Some limitations about the study should be discussed. Firstly, the patients are very heterogeneous, they may suffer from co-morbidities and may receive other pharmacological therapies, which may bias the results. Secondly, the researchers may involuntarily become unblinded since the active treatment will deliver facial contractions while this is not present during sham treatment. Thirdly, the relatively low number of patients may hamper the results; however, we eliminate the inter-individual variability because of the cross-over design.



1  
2  
3  
4 367 **ETHICS APPROVAL, CONSENT TO PARTICIPATE AND DISSEMINATION**

5  
6 368 The procedures set out in this study protocol, pertaining to conduct the study in compliance with Good Clinical  
7  
8 369 Practice (CPMP/ICH/135/95), designated Standard Operating Procedures, the Danish Health and Medicines  
9  
10 370 Authority, the Research Ethics Committee in Denmark, and within the principles of the World Medical  
11 371 Association, Declaration of Helsinki amended by the 52<sup>nd</sup> General Assembly, Edinburgh, Scotland, October  
12  
13 372 2000, clarified by the General Assembly in Washington 2002, Tokyo 2004, and Seoul 2008 and Fortaleza  
14  
15 373 2013 as outlined herein.

16  
17 374 Investigators (i.e. medical doctors) will obtain informed consent from each patient. We will conduct this study  
18 375 under the rules of Resolution 466/12 and Declaration of Helsinki. Data will be stored electronically in REDCap  
19  
20 376 database, with secure and restricted access. Data transfer will be encrypted and any information capable of  
21  
22 377 identifying individuals removed. Results gathered from this protocol will be presented at national and  
23 378 international conferences and will be published in peer-reviewed journals. All confidential patient data will be  
24  
25 379 protected, and patient identity will not be disclosed. Further dissemination of the data set can be decided by  
26 380 the principal investigator.

27  
28 381 Only researchers involved in the data collection and/or data analysis will have access to the final dataset.  
29  
30 382 However, the principal investigator allows direct access to all source data and documents at monitoring, and  
31  
32 383 inspection from the North Denmark Region Committee on Health Research Ethics, the Danish Health and  
33 384 Medicines Authority or from other countries' health authorities.

34  
35 385  
36  
37  
38 386 **Trial status**

39  
40 387 The recruitment of the study started in January 2018. As of January 2019, a total of 13 patients have completed  
41 388 the study.  
42  
43  
44  
45  
46  
47  
48  
49  
50  
51  
52  
53  
54  
55  
56  
57  
58  
59  
60

## References

1. Muniraj T, Aslanian HR, Farrell J, Jamidar PA. Chronic pancreatitis, a comprehensive review and update. Part I: Epidemiology, etiology, risk factors, genetics, pathophysiology, and clinical features. *Disease-a-Month*. 2014;60(12):530-550. doi:10.1016/j.disamonth.2014.11.002.
2. Pham A, Forsmark C. Chronic pancreatitis: review and update of etiology, risk factors, and management. *F1000Research*. 2018;7(May):607. doi:10.12688/f1000research.12852.1.
3. Mullady DK, Yadav D, Amann ST, et al. Type of pain, pain-associated complications, quality of life, disability and resource utilisation in chronic pancreatitis: a prospective cohort study. *Gut*. 2011;60(1):77-84. doi:10.1136/gut.2010.213835.
4. Botha C, Farmer AD, Nilsson M, et al. Preliminary report: modulation of parasympathetic nervous system tone influences oesophageal pain hypersensitivity. *Gut*. 2015;64(4):611-617. doi:10.1136/gutjnl-2013-306698.
5. Frøkjær JB, Bergmann S, Brock C, et al. Modulation of vagal tone enhances gastroduodenal motility and reduces somatic pain sensitivity. *Neurogastroenterol Motil*. 2016;28(4):592-598. doi:10.1111/nmo.12760.
6. Johnson RL, Wilson CG. A review of vagus nerve stimulation as a therapeutic intervention. *J Inflamm Res*. 2018;11:203-213. doi:10.2147/JIR.S163248.
7. Frøkjær JB, Bergmann S, Brock C, et al. Modulation of vagal tone enhances gastroduodenal motility and reduces somatic pain sensitivity. *Neurogastroenterol Motil*. 2016;28(4):592-598. doi:10.1111/nmo.12760.
8. Napadow V, Edwards RR, Cahalan CM, et al. Evoked Pain Analgesia in Chronic Pelvic Pain Patients Using Respiratory-Gated Auricular Vagal Afferent Nerve Stimulation. *Pain Med (United States)*. 2012;13(6):777-789. doi:10.1111/j.1526-4637.2012.01385.x.
9. Brock C, Brock B, Aziz Q, et al. Transcutaneous cervical vagal nerve stimulation modulates cardiac vagal tone and tumor necrosis factor-alpha. *Neurogastroenterol Motil*. 2017;29(5):4-7. doi:10.1111/nmo.12999.
10. Gaul C, Diener H-C, Silver N, et al. Non-invasive vagus nerve stimulation for PREvention and Acute treatment of chronic cluster headache (PREVA): A randomised controlled study. *Cephalalgia*. 2016;36(6):534-546. doi:10.1177/0333102415607070.
11. Moher D, Hopewell S, Schulz KF, et al. CONSORT 2010 explanation and elaboration: Updated guidelines for reporting parallel group randomised trials. *Int J Surg*. 2012 10(1): 28-55.

1  
2  
3  
4  
5  
6  
7  
8  
9  
10  
11  
12  
13  
14  
15  
16  
17  
18  
19  
20  
21  
22  
23  
24  
25  
26  
27  
28  
29  
30  
31  
32  
33  
34  
35  
36  
37  
38  
39  
40  
41  
42  
43  
44  
45  
46  
47  
48  
49  
50  
51  
52  
53  
54  
55  
56  
57  
58  
59  
60

- 420 doi:10.1016/j.ijvsu.2011.10.001.
- 421 12. Chan AW, Tetzlaff JM, Gøtzsche PC, et al. SPIRIT 2013 explanation and elaboration: guidance for protocols of clinical trials. *BMJ*. 2013 Jan8;346:e7586. doi:10.1136/bmj.e7586.
- 422
- 423 13. Vitória A, Araújo L De, Ribeiro V, et al. Effects of high-frequency transcranial magnetic stimulation on functional performance in individuals with incomplete spinal cord injury : study protocol for a randomized controlled trial. 2017: Nov 6; 18 (1):522. doi:10.1186/s13063-017-2280-1.
- 424
- 425
- 426 14. Kuppuswamy A, Balasubramaniam A V, Maksimovic R, et al. Clinical Neurophysiology Action of 5 Hz repetitive transcranial magnetic stimulation on sensory , motor and autonomic function in human spinal cord injury. *Clin Neurophysiol*. 2011;122(12):2452-2461. doi:10.1016/j.clinph.2011.04.022.
- 427
- 428
- 429 15. Layer P, Yamamoto H, Kalthoff L, Clain JE, Bakken LJ, DiMagno EP. The different courses of early- and late-onset idiopathic and alcoholic chronic pancreatitis. *Gastroenterology*. 1994;107(5):1481-1487. doi:10.1016/0016-5085(94)90553-3.
- 430
- 431
- 432 16. Strickland I, Mwamburi M, Davis S, et al. Noninvasive vagus nerve stimulation in a primary care setting: effects on quality of life and utilization measures in multimorbidity patients with or without primary headache. *Am J Manag Care*. 2018;24(24 Suppl):S517-S526.
- 433
- 434
- 435 17. A.D. N, J.C.A. M, E. T, M.H. R, P.J. G. Initial use of a novel noninvasive vagus nerve stimulator for cluster headache treatment. *Neurology*. 2015;84(12):1249-1253.
- 436
- 437 18. De Icco R, Martinelli D, Bitetto V, et al. Peripheral vagal nerve stimulation modulates the nociceptive withdrawal reflex in healthy subjects: A randomized, cross-over, sham-controlled study. *Cephalalgia*. 2018;38(10):1658-1664. doi:10.1177/0333102417742347.
- 438
- 439
- 440
- 441 19. Silberstein SD, Mechtler LL, Kudrow DB, et al. Noninvasive Vagus Nerve Stimulation for the Acute Treatment of Cluster Headache: Findings From the Randomized, Double-Blind, Sham-Controlled ACT1 Study. *Headache*. 2016;56(8):1317-1332. doi:10.1111/head.12896.
- 442
- 443 20. Fayers P. M. et al. EORTC QLQ-C30 Scoring Manual The EORTC QLQ-C30 Introduction. *EORTC QLQ-C30 Scoring Man EORTC QLQ-C30 Introd*. 2001;30:1-67. doi:D/2001/6136/001.
- 444
- 445 21. Cleeland CS. Brief Pain Inventory (BPI). *Cleel CS MD Anderson Cancer Cent*. 1982;1100:6. doi:10.1007/978-1-4419-9893-4\_13.
- 446
- 447 22. Farrar JT, Young JP, LaMoreaux L, Werth JL, Poole RM. Clinical importance of changes in chronic pain intensity measured on an 11-point numerical pain rating scale. *Pain*. 2001;94(2):149-158. doi:10.1016/S0304-3959(01)00349-9.
- 448
- 449
- 450

- 1  
2  
3  
4 450 23. Arendt-Nielsen L, Morlion B, Perrot S, et al. Assessment and manifestation of central sensitisation  
5 across different chronic pain conditions. *Eur J Pain (United Kingdom)*. 2018;22(2):216-241.  
6 451 doi:10.1002/ejp.1140.  
7 452  
8  
9  
10 453 24. Olesen SS, Bouwense SAW, Wildersmith OHG, Van Goor H, Drewes AM. Pregabalin reduces pain  
11 454 in patients with chronic pancreatitis in a randomized, controlled trial. *Gastroenterology*. 2011 Aug;  
12 141 (2): 536-543. doi:10.1053/j.gastro.2011.04.003.  
13 455  
14  
15 456 25. Kennedy DL, Kemp HI, Ridout D, Yarnitsky D, Rice ASC. Reliability of conditioned pain  
16 modulation: A systematic review. *Pain*. 2016;157(11):2410-2419.  
17 457 doi:10.1097/j.pain.0000000000000689.  
18 458  
19  
20 459 26. Yarnitsky D, Bouhassira D, Drewes AM, et al. Recommendations on practice of conditioned pain  
21 modulation (CPM) testing. *Eur J Pain (United Kingdom)*. 2015;19(6):805-806. doi:10.1002/ejp.605.  
22 460  
23  
24 461 27. Farmer AD, Coen SJ, Kano M, et al. Normal values and reproducibility of the real-time index of  
25 vagal tone in healthy humans: a multi-center study. *Ann Gastroenterol Q Publ Hell Soc*  
26 462 *Gastroenterol*. 2014;27(4):362-368.  
27 463  
28  
29  
30 464 28. Trial C, Olesen SS, Bouwense SAW, Smith OHGW, Goor HVAN. CLINICAL — PANCREAS  
31 465 Pregabalin Reduces Pain in Patients With Chronic Pancreatitis in a. *YGAST*. 2011;141(2):536-543.  
32 466 doi:10.1053/j.gastro.2011.04.003.  
33 467  
34  
35 467 29. College Station TSL. StataCorp. 2015. *Stata Stat Softw Release 13*. 2013.  
36  
37 468 30. Harris PA, Taylor R, Thielke R, Payne J, Gonzalez N, Conde JG. Research electronic data capture  
38 (REDCap)-A metadata-driven methodology and workflow process for providing translational  
39 469 research informatics support. *J Biomed Inform*. 2009 Apr;42(2):377-81.  
40 470 doi:10.1016/j.jbi.2008.08.010.  
41 471  
42 472 31. Hansen TM, Olesen AE, Simonsen CW, Drewes AM, Frøkjær JB. Cingulate metabolites during pain  
43 and morphine treatment as assessed by magnetic resonance spectroscopy. *J Pain Res*. 2014;7:269-  
44 474 276. doi:10.2147/JPR.S61193.  
45  
46 475 32. Dimcevski G, Sami SAK, Funch-Jensen P, et al. {A figure is presented}Pain in Chronic Pancreatitis:  
47 476 The Role of Reorganization in the Central Nervous System. *Gastroenterology*. 2007;132(4):1546-  
48 477 1556. doi:10.1053/j.gastro.2007.01.037.  
49  
50 478 33. Frøkjær JB, Olesen SS, Gram M, et al. Altered brain microstructure assessed by diffusion tensor  
51 479 imaging in patients with chronic pancreatitis. *Gut*. 2011;60(11):1554-1562.  
52 480 doi:10.1136/gut.2010.236620.  
53  
54  
55  
56  
57  
58  
59  
60

1  
2  
3  
4  
5  
6  
7  
8  
9  
10  
11  
12  
13  
14  
15  
16  
17  
18  
19  
20  
21  
22  
23  
24  
25  
26  
27  
28  
29  
30  
31  
32  
33  
34  
35  
36  
37  
38  
39  
40  
41  
42  
43  
44  
45  
46  
47  
48  
49  
50  
51  
52  
53  
54  
55  
56  
57  
58  
59  
60

34. Frøkjær JB, Bouwense SAW, Olesen SS, et al. Reduced Cortical Thickness of Brain Areas Involved in Pain Processing in Patients With Chronic Pancreatitis. *Clin Gastroenterol Hepatol*. 2012;10(4):434-438. doi:10.1016/j.cgh.2011.11.024.
35. Lelic D, Olesen SS, Graversen C, Brock C, Valeriani M, Drewes AM. Electrophysiology as a tool to unravel the origin of pancreatic pain. *World J Gastrointest Pathophysiol*. 2014;5(1):33-39. doi:10.4291/wjgp.v5.i1.33.
36. Muthulingam J, Olesen SS, Hansen TM, et al. Progression of Structural Brain Changes in Patients With Chronic Pancreatitis and Its Association to Chronic Pain: A 7-Year Longitudinal Follow-up Study. *Pancreas*. 2018;47(10):1267-1276. doi:10.1097/MPA.0000000000001151.
37. Apkarian A V, Hashmi JA, Baliki MN. Pain and the brain: Specificity and plasticity of the brain in clinical chronic pain. *Pain*. 2011;152(3 Suppl):S49-64. doi:10.1016/j.pain.2010.11.010.
38. Garcia RG, Lin RL, Lee J, et al. Modulation of brainstem activity and connectivity by respiratory-gated auricular vagal afferent nerve stimulation in migraine patients. *Pain*. 2017;158(8):1461-1472. doi:10.1097/j.pain.0000000000000930.
39. O'Connell NE, Marston L, Spencer S, et al. Non-invasive brain stimulation techniques for chronic pain. *Cochrane database Syst Rev*. 2018;3(9):CD008208. doi:10.1002/14651858.CD008208.pub2.
40. Seminowicz DA, Wideman TH, Naso L, et al. Effective Treatment of Chronic Low Back Pain in Humans Reverses Abnormal Brain Anatomy and Function. *J Neurosci*. 2011;31(20):7540-7550. doi:10.1523/JNEUROSCI.5280-10.2011.
41. Čeko M, Shir Y, Ouellet JA, Ware MA, Stone LS, Seminowicz DA. Partial recovery of abnormal insula and dorsolateral prefrontal connectivity to cognitive networks in chronic low back pain after treatment. *Hum Brain Mapp*. 2015;36(6):2075-2092. doi:10.1002/hbm.22757.
42. Bonaz B, Sinniger V, Pellissier S. Vagal tone: Effects on sensitivity, motility, and inflammation. *Neurogastroenterol Motil*. 2016;28(4):455-462. doi:10.1111/nmo.12817.
43. Watkins LR, Maier SF, Goehler LE. Cytokine-to-brain communication: A review & analysis of alternative mechanisms. *Life Sci*. 1995;57(11):1011-1026. doi:10.1016/0024-3205(95)02047-M.
44. Hosoi T, Okuma Y, Matsuda T, Nomura Y. Novel pathway for LPS-induced afferent vagus nerve activation: Possible role of nodose ganglion. *Auton Neurosci Basic Clin*. 2005;120(1-2):104-107. doi:10.1016/j.autneu.2004.11.012.

## Legends for illustrations

- Figure 1: Mode of action of transcutaneous vagal nerve stimulation (t-VNS). (1) Pain arises in the periphery e.g. pancreas and a signal is sent to the spinal cord. This leads to ascending activation of the spinal neurons (2). In the brain, pain is processed in higher cortical centres (3). T-VNS, it is expected to block the perception of pain in the cerebral cortex, by stimulating nucleus tractus solitarius and thereby decrease glutamate level. Simultaneously, the net-descending inhibition will be activated as a result of top-down input from cortex and the limbic system (4).
- Figure 2: Schematic flowchart of the interventional study design enabling comparison of the modulatory effect to self-administered of transcutaneous vagal nerve stimulation (t-VNS) in patients with chronic pancreatitis. Chronic pancreatitis patients will be randomly assigned to one of two double blinded treatments: (1) two weeks of t-VNS, two weeks of wash-out, and two weeks of sham treatment; or (2) two weeks of sham treatment, two weeks of washout, and two weeks of t-VNS. Evaluation of the two treatments will be assessed by collecting pain diary, pain questionnaires, MRI scan, blood sample, cardiac vagal tone, and pain assessments. QST=Quantitative sensory testing. CVT=Cardiac vagal tone. MRI=Magnetic resonance imaging.
- Figure 3: SPIRIT Figure.



545 **Table 1: Trial characteristics based on WHO Trial Registration Data Set**

| <b>Data category</b>                          | <b>Trial Information</b>                                                                                                                                                                                                                                                                                                                                                                                                                                                                                                                                                                                                                                                                                                                                                                                                                                                                                                                                                                                                                                                                                                                                                                                                                                                                                                                                                                                                                                                                                       |
|-----------------------------------------------|----------------------------------------------------------------------------------------------------------------------------------------------------------------------------------------------------------------------------------------------------------------------------------------------------------------------------------------------------------------------------------------------------------------------------------------------------------------------------------------------------------------------------------------------------------------------------------------------------------------------------------------------------------------------------------------------------------------------------------------------------------------------------------------------------------------------------------------------------------------------------------------------------------------------------------------------------------------------------------------------------------------------------------------------------------------------------------------------------------------------------------------------------------------------------------------------------------------------------------------------------------------------------------------------------------------------------------------------------------------------------------------------------------------------------------------------------------------------------------------------------------------|
| Primary Registry and Trial Identifying Number | ClinicalTrials.gov (NCT03357029)                                                                                                                                                                                                                                                                                                                                                                                                                                                                                                                                                                                                                                                                                                                                                                                                                                                                                                                                                                                                                                                                                                                                                                                                                                                                                                                                                                                                                                                                               |
| Date of Registration in Primary Registry      | November 29, 2017                                                                                                                                                                                                                                                                                                                                                                                                                                                                                                                                                                                                                                                                                                                                                                                                                                                                                                                                                                                                                                                                                                                                                                                                                                                                                                                                                                                                                                                                                              |
| Secondary Identifying Numbers                 | North Denmark Region Committee on Health Research Ethics: protocol number N-20170023                                                                                                                                                                                                                                                                                                                                                                                                                                                                                                                                                                                                                                                                                                                                                                                                                                                                                                                                                                                                                                                                                                                                                                                                                                                                                                                                                                                                                           |
| Source(s) of Monetary or Material Support     | The study is conducted as a sponsor-investigator initiated study with financial support from Independent Research Fund Denmark (DFR – 7016-00073).                                                                                                                                                                                                                                                                                                                                                                                                                                                                                                                                                                                                                                                                                                                                                                                                                                                                                                                                                                                                                                                                                                                                                                                                                                                                                                                                                             |
| Primary Sponsor                               | JBF                                                                                                                                                                                                                                                                                                                                                                                                                                                                                                                                                                                                                                                                                                                                                                                                                                                                                                                                                                                                                                                                                                                                                                                                                                                                                                                                                                                                                                                                                                            |
| Secondary Sponsor                             | NA                                                                                                                                                                                                                                                                                                                                                                                                                                                                                                                                                                                                                                                                                                                                                                                                                                                                                                                                                                                                                                                                                                                                                                                                                                                                                                                                                                                                                                                                                                             |
| Contact for Public Queries                    | JBF                                                                                                                                                                                                                                                                                                                                                                                                                                                                                                                                                                                                                                                                                                                                                                                                                                                                                                                                                                                                                                                                                                                                                                                                                                                                                                                                                                                                                                                                                                            |
| Contact for Scientific Queries                | JBF                                                                                                                                                                                                                                                                                                                                                                                                                                                                                                                                                                                                                                                                                                                                                                                                                                                                                                                                                                                                                                                                                                                                                                                                                                                                                                                                                                                                                                                                                                            |
| Public title                                  | Neuromodulation in Patients with Painful Chronic Pancreatitis                                                                                                                                                                                                                                                                                                                                                                                                                                                                                                                                                                                                                                                                                                                                                                                                                                                                                                                                                                                                                                                                                                                                                                                                                                                                                                                                                                                                                                                  |
| Scientific title                              | Study protocol for a randomized double-blinded, sham-controlled, prospective, cross-over clinical trial of vagal neuromodulation for pain treatment in patients with chronic pancreatitis                                                                                                                                                                                                                                                                                                                                                                                                                                                                                                                                                                                                                                                                                                                                                                                                                                                                                                                                                                                                                                                                                                                                                                                                                                                                                                                      |
| Country of recruitment                        | Denmark                                                                                                                                                                                                                                                                                                                                                                                                                                                                                                                                                                                                                                                                                                                                                                                                                                                                                                                                                                                                                                                                                                                                                                                                                                                                                                                                                                                                                                                                                                        |
| Healthy conditions(s) or problems studied     | Chronic pancreatitis                                                                                                                                                                                                                                                                                                                                                                                                                                                                                                                                                                                                                                                                                                                                                                                                                                                                                                                                                                                                                                                                                                                                                                                                                                                                                                                                                                                                                                                                                           |
| Interventions                                 | Two-week transcutaneous vagal nerve stimulation (t-VNS) on the cervical vagal area (Self-administering vagal nerve stimulation bilaterally to the cervical vagal area, the times per day).                                                                                                                                                                                                                                                                                                                                                                                                                                                                                                                                                                                                                                                                                                                                                                                                                                                                                                                                                                                                                                                                                                                                                                                                                                                                                                                     |
| Key inclusion and exclusion criteria          | Inclusion criteria: Age $\geq 18$ years; Patients with a diagnosis of CP diagnosed using the Mayo Clinic diagnostic criteria.; The participants must be able to read and understand Danish.; The patients must suffer from chronic abdominal pain characteristic for CP, meet the criteria for chronic pain (pain $\geq 3$ days per week in at least 3 months) and must consider their pain as insufficiently treated with their usual analgesic treatment. ; Personally, signed and dated informed consent document and the Power of attorney document; Patients willing and able to comply with the scheduled visits, treatment plan, laboratory tests and other trial procedures. Exclusion criteria: Patients with any clinically significant abnormalities that in the opinion of the investigator may increase the risk associated with trial participation or may interfere with the interpretation of the trial results. ; Alcohol dependence; Illegal drug dependencies; Participating in another study where investigational drug is used. ; Patients must not suffer from painful conditions other than CP that make them unable to distinguish the pain associated with CP from chronic pain of other origin.; Cardiovascular diseases ; Low blood pressure $< 100/60$ , Not able to understand or follow the instructions, ; Any condition with elevated intracranial pressure.; Female patients who are pregnant; Contraindications for MRI; Previous surgery on vagal nerve.; Known neuropathy. |
| Study type                                    | Interventional allocation: randomized<br>Masking: double-blind<br>Assignment: cross-over<br>Primary purpose: treatment                                                                                                                                                                                                                                                                                                                                                                                                                                                                                                                                                                                                                                                                                                                                                                                                                                                                                                                                                                                                                                                                                                                                                                                                                                                                                                                                                                                         |

|                            |                                                                                                                                             |
|----------------------------|---------------------------------------------------------------------------------------------------------------------------------------------|
| Date of first enrolment    | January 2018                                                                                                                                |
| Target sample size         | 21                                                                                                                                          |
| Recruitment status         | Recruiting                                                                                                                                  |
| Primary outcome(s)         | Change in NRS scores in pain diary                                                                                                          |
| Key Secondary outcomes (s) | Assessment of the effect of t-VNS on A) resting state brain function assessed by MRI, and B) brain metabolites assessed by MR spectroscopy. |

For peer review only



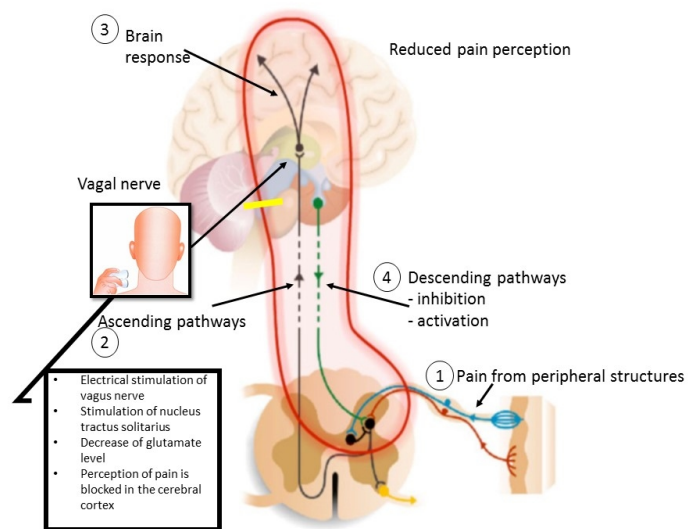

Figure 1: Mode of action of transcutaneous vagal nerve stimulation (t-VNS). (1) Pain arises in the periphery e.g. pancreas and a signal is sent to the spinal cord. This leads to ascending activation of the spinal neurons (2). In the brain, pain is processed in higher cortical centres (3). T-VNS, it is expected to block the perception of pain in the cerebral cortex, by stimulating nucleus tractus solitarius and thereby decrease glutamate level. Simultaneously, the net-descending inhibition will be activated as a result of top-down input from cortex and the limbic system (4).

338x190mm (96 x 96 DPI)

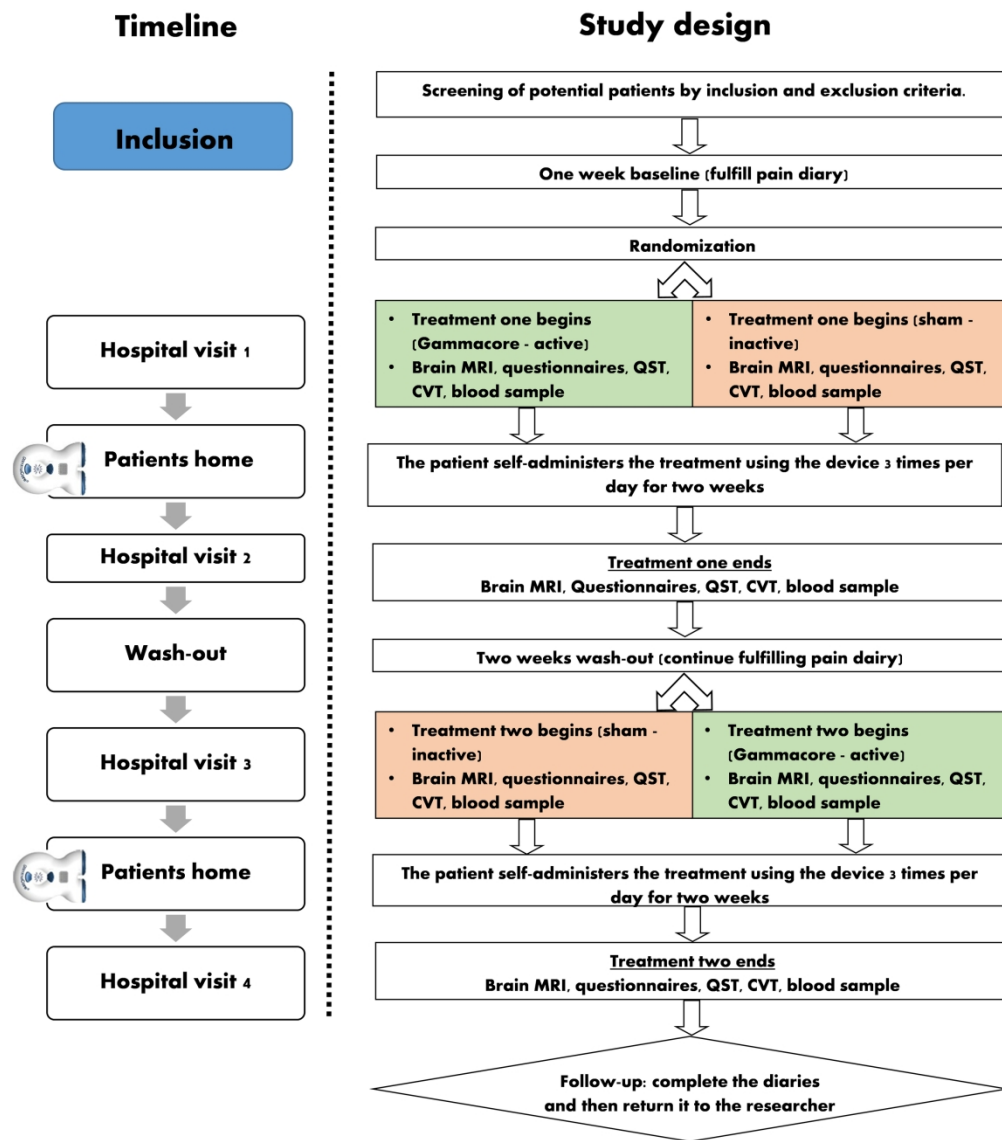

Figure 2: Schematic flowchart of the interventional study design enabling comparison of the modulatory effect to self-administered of transcutaneous vagal nerve stimulation (t-VNS) in patients with chronic pancreatitis. Chronic pancreatitis patients will be randomly assigned to one of two double blinded treatments: (1) two weeks of t-VNS, two weeks of wash-out, and two weeks of sham treatment; or (2) two weeks of sham treatment, two weeks of washout, and two weeks of t-VNS. Evaluation of the two treatments will be assessed by collecting pain diary, pain questionnaires, MRI scan, blood sample, cardiac vagal tone, and pain assessments. QST=Quantitative sensory testing. CVT=Cardiac vagal tone. MRI=Magnetic resonance imaging.

220x253mm (300 x 300 DPI)

|                                      | STUDY PERIOD          |                       |                 |       |       |       |       |       |           |
|--------------------------------------|-----------------------|-----------------------|-----------------|-------|-------|-------|-------|-------|-----------|
|                                      | Enrolment & screening | Baseline & allocation | Post-allocation |       |       |       |       |       | Follow-up |
| TIMEPOINT**                          | $T_{-1}$              | 0                     | $T_1$           | $T_2$ | $T_3$ | $T_4$ | $T_5$ | $T_6$ | $T_7$     |
| Week                                 | 0                     | 1                     | 2               | 3     | 4     | 5     | 6     | 7     | 8         |
| <b>ENROLMENT:</b>                    |                       |                       |                 |       |       |       |       |       |           |
| Eligibility screen                   | X                     |                       |                 |       |       |       |       |       |           |
| Informed consent                     | X                     |                       |                 |       |       |       |       |       |           |
| Allocation                           |                       | X                     |                 |       |       |       |       |       |           |
| <b>INTERVENTIONS:</b>                |                       |                       |                 |       |       |       |       |       |           |
| <i>[transcutaneous VNS (active)]</i> |                       |                       | X               | X     |       |       | X     | X     |           |
| <i>[Sham treatment]</i>              |                       |                       | X               | X     |       |       | X     | X     |           |
|                                      |                       |                       |                 |       |       |       |       |       |           |
| <b>ASSESSMENTS:</b>                  |                       |                       |                 |       |       |       |       |       |           |
| <i>Pain diary</i>                    |                       | X                     | X               | X     | X     | X     | X     | X     | X         |
| <i>QORTC-QLQ-C30 questionnaire</i>   |                       |                       | X               | X     |       |       | X     | X     |           |
| <i>BPI-SF Questionnaire</i>          |                       |                       | X               | X     |       |       | X     | X     |           |
| <i>PGIC questionnaire</i>            |                       |                       |                 | X     |       |       |       | X     |           |
| <i>MRI</i>                           |                       |                       | X               | X     |       |       | X     | X     |           |
| <i>CVT</i>                           |                       |                       | X               | X     |       |       | X     | X     |           |
| <i>Blood samples</i>                 |                       |                       | X               | X     |       |       | X     | X     |           |
| <i>QST</i>                           |                       |                       | X               | X     |       |       | X     | X     |           |
| <i>[Adverse events]</i>              |                       |                       | X               | X     | X     |       | X     | X     |           |

Figure 3: SPIRIT Figure.

87x104mm (300 x 300 DPI)

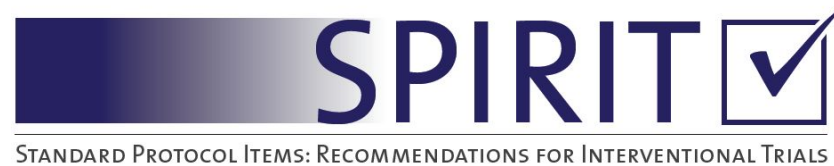

SPIRIT 2013 Checklist: Recommended items to address in a clinical trial protocol and related documents\*

| Section/item                      | Item No | Description                                                                                                                                                                                                                                                                              | Addressed on page number |
|-----------------------------------|---------|------------------------------------------------------------------------------------------------------------------------------------------------------------------------------------------------------------------------------------------------------------------------------------------|--------------------------|
| <b>Administrative information</b> |         |                                                                                                                                                                                                                                                                                          |                          |
| Title                             | 1       | Descriptive title identifying the study design, population, interventions, and, if applicable, trial acronym                                                                                                                                                                             | ___1___                  |
| Trial registration                | 2a      | Trial identifier and registry name. If not yet registered, name of intended registry                                                                                                                                                                                                     | ___2___                  |
|                                   | 2b      | All items from the World Health Organization Trial Registration Data Set                                                                                                                                                                                                                 | __Table 1__              |
| Protocol version                  | 3       | Date and version identifier                                                                                                                                                                                                                                                              | ___1___                  |
| Funding                           | 4       | Sources and types of financial, material, and other support                                                                                                                                                                                                                              | ___1___                  |
| Roles and responsibilities        | 5a      | Names, affiliations, and roles of protocol contributors                                                                                                                                                                                                                                  | ___1___                  |
|                                   | 5b      | Name and contact information for the trial sponsor                                                                                                                                                                                                                                       | ___1___                  |
|                                   | 5c      | Role of study sponsor and funders, if any, in study design; collection, management, analysis, and interpretation of data; writing of the report; and the decision to submit the report for publication, including whether they will have ultimate authority over any of these activities | ___1___                  |
|                                   | 5d      | Composition, roles, and responsibilities of the coordinating centre, steering committee, endpoint adjudication committee, data management team, and other individuals or groups overseeing the trial, if applicable (see Item 21a for data monitoring committee)                         | Not applicable           |

|    |                                                           |     |                                                                                                               |                  |
|----|-----------------------------------------------------------|-----|---------------------------------------------------------------------------------------------------------------|------------------|
| 1  | <b>Introduction</b>                                       |     |                                                                                                               |                  |
| 2  |                                                           |     |                                                                                                               |                  |
| 3  | Background and                                            | 6a  | Description of research question and justification for undertaking the trial, including summary of relevant   | __4-5, 7-8, 11__ |
| 4  | rationale                                                 |     | studies (published and unpublished) examining benefits and harms for each intervention                        |                  |
| 5  |                                                           |     |                                                                                                               |                  |
| 6  |                                                           | 6b  | Explanation for choice of comparators                                                                         | __7-9__          |
| 7  |                                                           |     |                                                                                                               |                  |
| 8  | Objectives                                                | 7   | Specific objectives or hypotheses                                                                             | __4-5__          |
| 9  |                                                           |     |                                                                                                               |                  |
| 10 | Trial design                                              | 8   | Description of trial design including type of trial (eg, parallel group, crossover, factorial, single group), |                  |
| 11 |                                                           |     | allocation ratio, and framework (eg, superiority, equivalence, noninferiority, exploratory)                   | __6__            |
| 12 |                                                           |     |                                                                                                               |                  |
| 13 |                                                           |     |                                                                                                               |                  |
| 14 | <b>Methods: Participants, interventions, and outcomes</b> |     |                                                                                                               |                  |
| 15 |                                                           |     |                                                                                                               |                  |
| 16 | Study setting                                             | 9   | Description of study settings (eg, community clinic, academic hospital) and list of countries where data will | __6__            |
| 17 |                                                           |     | be collected. Reference to where list of study sites can be obtained                                          |                  |
| 18 |                                                           |     |                                                                                                               |                  |
| 19 | Eligibility criteria                                      | 10  | Inclusion and exclusion criteria for participants. If applicable, eligibility criteria for study centres and  | __6-7__          |
| 20 |                                                           |     | individuals who will perform the interventions (eg, surgeons, psychotherapists)                               |                  |
| 21 |                                                           |     |                                                                                                               |                  |
| 22 | Interventions                                             | 11a | Interventions for each group with sufficient detail to allow replication, including how and when they will be | __7-8__          |
| 23 |                                                           |     | administered                                                                                                  |                  |
| 24 |                                                           |     |                                                                                                               |                  |
| 25 |                                                           | 11b | Criteria for discontinuing or modifying allocated interventions for a given trial participant (eg, drug dose  | __7__            |
| 26 |                                                           |     | change in response to harms, participant request, or improving/worsening disease)                             |                  |
| 27 |                                                           |     |                                                                                                               |                  |
| 28 |                                                           | 11c | Strategies to improve adherence to intervention protocols, and any procedures for monitoring adherence        | __8__            |
| 29 |                                                           |     | (eg, drug tablet return, laboratory tests)                                                                    |                  |
| 30 |                                                           |     |                                                                                                               |                  |
| 31 |                                                           | 11d | Relevant concomitant care and interventions that are permitted or prohibited during the trial                 | __7__            |
| 32 |                                                           |     |                                                                                                               |                  |
| 33 | Outcomes                                                  | 12  | Primary, secondary, and other outcomes, including the specific measurement variable (eg, systolic blood       | __9-11__         |
| 34 |                                                           |     | pressure), analysis metric (eg, change from baseline, final value, time to event), method of aggregation (eg, |                  |
| 35 |                                                           |     | median, proportion), and time point for each outcome. Explanation of the clinical relevance of chosen         |                  |
| 36 |                                                           |     | efficacy and harm outcomes is strongly recommended                                                            |                  |
| 37 |                                                           |     |                                                                                                               |                  |
| 38 | Participant timeline                                      | 13  | Time schedule of enrolment, interventions (including any run-ins and washouts), assessments, and visits for   | __Figure 2 & 3__ |
| 39 |                                                           |     | participants. A schematic diagram is highly recommended (see Figure)                                          |                  |
| 40 |                                                           |     |                                                                                                               |                  |
| 41 |                                                           |     |                                                                                                               |                  |
| 42 |                                                           |     |                                                                                                               |                  |
| 43 |                                                           |     |                                                                                                               |                  |
| 44 |                                                           |     |                                                                                                               |                  |
| 45 |                                                           |     |                                                                                                               |                  |
| 46 |                                                           |     |                                                                                                               |                  |

|    |                                                                     |     |                                                                                                                                                                                                                                                                                                                                                                                                              |                |
|----|---------------------------------------------------------------------|-----|--------------------------------------------------------------------------------------------------------------------------------------------------------------------------------------------------------------------------------------------------------------------------------------------------------------------------------------------------------------------------------------------------------------|----------------|
| 1  | Sample size                                                         | 14  | Estimated number of participants needed to achieve study objectives and how it was determined, including clinical and statistical assumptions supporting any sample size calculations                                                                                                                                                                                                                        | __11__         |
| 2  |                                                                     |     |                                                                                                                                                                                                                                                                                                                                                                                                              |                |
| 3  |                                                                     |     |                                                                                                                                                                                                                                                                                                                                                                                                              |                |
| 4  | Recruitment                                                         | 15  | Strategies for achieving adequate participant enrolment to reach target sample size                                                                                                                                                                                                                                                                                                                          | __6__          |
| 5  |                                                                     |     |                                                                                                                                                                                                                                                                                                                                                                                                              |                |
| 6  |                                                                     |     |                                                                                                                                                                                                                                                                                                                                                                                                              |                |
| 7  | <b>Methods: Assignment of interventions (for controlled trials)</b> |     |                                                                                                                                                                                                                                                                                                                                                                                                              |                |
| 8  | Allocation:                                                         |     |                                                                                                                                                                                                                                                                                                                                                                                                              |                |
| 9  |                                                                     |     |                                                                                                                                                                                                                                                                                                                                                                                                              |                |
| 10 | Sequence                                                            | 16a | Method of generating the allocation sequence (eg, computer-generated random numbers), and list of any factors for stratification. To reduce predictability of a random sequence, details of any planned restriction (eg, blocking) should be provided in a separate document that is unavailable to those who enrol participants or assign interventions                                                     | __8__          |
| 11 | generation                                                          |     |                                                                                                                                                                                                                                                                                                                                                                                                              |                |
| 12 |                                                                     |     |                                                                                                                                                                                                                                                                                                                                                                                                              |                |
| 13 |                                                                     |     |                                                                                                                                                                                                                                                                                                                                                                                                              |                |
| 14 |                                                                     |     |                                                                                                                                                                                                                                                                                                                                                                                                              |                |
| 15 |                                                                     |     |                                                                                                                                                                                                                                                                                                                                                                                                              |                |
| 16 | Allocation                                                          | 16b | Mechanism of implementing the allocation sequence (eg, central telephone; sequentially numbered, opaque, sealed envelopes), describing any steps to conceal the sequence until interventions are assigned                                                                                                                                                                                                    | __8__          |
| 17 | concealment                                                         |     |                                                                                                                                                                                                                                                                                                                                                                                                              |                |
| 18 | mechanism                                                           |     |                                                                                                                                                                                                                                                                                                                                                                                                              |                |
| 19 |                                                                     |     |                                                                                                                                                                                                                                                                                                                                                                                                              |                |
| 20 | Implementation                                                      | 16c | Who will generate the allocation sequence, who will enrol participants, and who will assign participants to interventions                                                                                                                                                                                                                                                                                    | __8__          |
| 21 |                                                                     |     |                                                                                                                                                                                                                                                                                                                                                                                                              |                |
| 22 |                                                                     |     |                                                                                                                                                                                                                                                                                                                                                                                                              |                |
| 23 |                                                                     |     |                                                                                                                                                                                                                                                                                                                                                                                                              |                |
| 24 | Blinding (masking)                                                  | 17a | Who will be blinded after assignment to interventions (eg, trial participants, care providers, outcome assessors, data analysts), and how                                                                                                                                                                                                                                                                    | __8,9__        |
| 25 |                                                                     |     |                                                                                                                                                                                                                                                                                                                                                                                                              |                |
| 26 |                                                                     |     |                                                                                                                                                                                                                                                                                                                                                                                                              |                |
| 27 |                                                                     | 17b | If blinded, circumstances under which unblinding is permissible, and procedure for revealing a participant's allocated intervention during the trial                                                                                                                                                                                                                                                         | __9__          |
| 28 |                                                                     |     |                                                                                                                                                                                                                                                                                                                                                                                                              |                |
| 29 |                                                                     |     |                                                                                                                                                                                                                                                                                                                                                                                                              |                |
| 30 |                                                                     |     |                                                                                                                                                                                                                                                                                                                                                                                                              |                |
| 31 | <b>Methods: Data collection, management, and analysis</b>           |     |                                                                                                                                                                                                                                                                                                                                                                                                              |                |
| 32 |                                                                     |     |                                                                                                                                                                                                                                                                                                                                                                                                              |                |
| 33 | Data collection                                                     | 18a | Plans for assessment and collection of outcome, baseline, and other trial data, including any related processes to promote data quality (eg, duplicate measurements, training of assessors) and a description of study instruments (eg, questionnaires, laboratory tests) along with their reliability and validity, if known. Reference to where data collection forms can be found, if not in the protocol | __7-12__       |
| 34 | methods                                                             |     |                                                                                                                                                                                                                                                                                                                                                                                                              |                |
| 35 |                                                                     |     |                                                                                                                                                                                                                                                                                                                                                                                                              |                |
| 36 |                                                                     |     |                                                                                                                                                                                                                                                                                                                                                                                                              |                |
| 37 |                                                                     |     |                                                                                                                                                                                                                                                                                                                                                                                                              |                |
| 38 |                                                                     |     |                                                                                                                                                                                                                                                                                                                                                                                                              |                |
| 39 |                                                                     | 18b | Plans to promote participant retention and complete follow-up, including list of any outcome data to be collected for participants who discontinue or deviate from intervention protocols                                                                                                                                                                                                                    | Not applicable |
| 40 |                                                                     |     |                                                                                                                                                                                                                                                                                                                                                                                                              |                |
| 41 |                                                                     |     |                                                                                                                                                                                                                                                                                                                                                                                                              |                |
| 42 |                                                                     |     |                                                                                                                                                                                                                                                                                                                                                                                                              |                |
| 43 |                                                                     |     |                                                                                                                                                                                                                                                                                                                                                                                                              |                |
| 44 |                                                                     |     |                                                                                                                                                                                                                                                                                                                                                                                                              |                |
| 45 |                                                                     |     |                                                                                                                                                                                                                                                                                                                                                                                                              |                |
| 46 |                                                                     |     |                                                                                                                                                                                                                                                                                                                                                                                                              |                |

|    |                                 |     |                                                                                                                                                                                                                                                                                                                                       |                |
|----|---------------------------------|-----|---------------------------------------------------------------------------------------------------------------------------------------------------------------------------------------------------------------------------------------------------------------------------------------------------------------------------------------|----------------|
| 1  | Data management                 | 19  | Plans for data entry, coding, security, and storage, including any related processes to promote data quality (eg, double data entry; range checks for data values). Reference to where details of data management procedures can be found, if not in the protocol                                                                     | ___11,12___    |
| 2  |                                 |     |                                                                                                                                                                                                                                                                                                                                       |                |
| 3  |                                 |     |                                                                                                                                                                                                                                                                                                                                       |                |
| 4  |                                 |     |                                                                                                                                                                                                                                                                                                                                       |                |
| 5  | Statistical methods             | 20a | Statistical methods for analysing primary and secondary outcomes. Reference to where other details of the statistical analysis plan can be found, if not in the protocol                                                                                                                                                              | ___12___       |
| 6  |                                 |     |                                                                                                                                                                                                                                                                                                                                       |                |
| 7  |                                 |     |                                                                                                                                                                                                                                                                                                                                       |                |
| 8  |                                 | 20b | Methods for any additional analyses (eg, subgroup and adjusted analyses)                                                                                                                                                                                                                                                              | Not applicable |
| 9  |                                 |     |                                                                                                                                                                                                                                                                                                                                       |                |
| 10 |                                 | 20c | Definition of analysis population relating to protocol non-adherence (eg, as randomised analysis), and any statistical methods to handle missing data (eg, multiple imputation)                                                                                                                                                       | ___12___       |
| 11 |                                 |     |                                                                                                                                                                                                                                                                                                                                       |                |
| 12 |                                 |     |                                                                                                                                                                                                                                                                                                                                       |                |
| 13 |                                 |     |                                                                                                                                                                                                                                                                                                                                       |                |
| 14 | <b>Methods: Monitoring</b>      |     |                                                                                                                                                                                                                                                                                                                                       |                |
| 15 |                                 |     |                                                                                                                                                                                                                                                                                                                                       |                |
| 16 | Data monitoring                 | 21a | Composition of data monitoring committee (DMC); summary of its role and reporting structure; statement of whether it is independent from the sponsor and competing interests; and reference to where further details about its charter can be found, if not in the protocol. Alternatively, an explanation of why a DMC is not needed | ___12___       |
| 17 |                                 |     |                                                                                                                                                                                                                                                                                                                                       |                |
| 18 |                                 |     |                                                                                                                                                                                                                                                                                                                                       |                |
| 19 |                                 |     |                                                                                                                                                                                                                                                                                                                                       |                |
| 20 |                                 |     |                                                                                                                                                                                                                                                                                                                                       |                |
| 21 |                                 |     |                                                                                                                                                                                                                                                                                                                                       |                |
| 22 |                                 | 21b | Description of any interim analyses and stopping guidelines, including who will have access to these interim results and make the final decision to terminate the trial                                                                                                                                                               | ___12___       |
| 23 |                                 |     |                                                                                                                                                                                                                                                                                                                                       |                |
| 24 |                                 |     |                                                                                                                                                                                                                                                                                                                                       |                |
| 25 | Harms                           | 22  | Plans for collecting, assessing, reporting, and managing solicited and spontaneously reported adverse events and other unintended effects of trial interventions or trial conduct                                                                                                                                                     | ___12___       |
| 26 |                                 |     |                                                                                                                                                                                                                                                                                                                                       |                |
| 27 |                                 |     |                                                                                                                                                                                                                                                                                                                                       |                |
| 28 | Auditing                        | 23  | Frequency and procedures for auditing trial conduct, if any, and whether the process will be independent from investigators and the sponsor                                                                                                                                                                                           | Not applicable |
| 29 |                                 |     |                                                                                                                                                                                                                                                                                                                                       |                |
| 30 |                                 |     |                                                                                                                                                                                                                                                                                                                                       |                |
| 31 |                                 |     |                                                                                                                                                                                                                                                                                                                                       |                |
| 32 | <b>Ethics and dissemination</b> |     |                                                                                                                                                                                                                                                                                                                                       |                |
| 33 |                                 |     |                                                                                                                                                                                                                                                                                                                                       |                |
| 34 | Research ethics approval        | 24  | Plans for seeking research ethics committee/institutional review board (REC/IRB) approval                                                                                                                                                                                                                                             | ___6___        |
| 35 |                                 |     |                                                                                                                                                                                                                                                                                                                                       |                |
| 36 |                                 |     |                                                                                                                                                                                                                                                                                                                                       |                |
| 37 | Protocol amendments             | 25  | Plans for communicating important protocol modifications (eg, changes to eligibility criteria, outcomes, analyses) to relevant parties (eg, investigators, REC/IRBs, trial participants, trial registries, journals, regulators)                                                                                                      | Not applicable |
| 38 |                                 |     |                                                                                                                                                                                                                                                                                                                                       |                |
| 39 |                                 |     |                                                                                                                                                                                                                                                                                                                                       |                |
| 40 |                                 |     |                                                                                                                                                                                                                                                                                                                                       |                |
| 41 |                                 |     |                                                                                                                                                                                                                                                                                                                                       |                |
| 42 |                                 |     |                                                                                                                                                                                                                                                                                                                                       |                |

|    |                               |     |                                                                                                                                                                                                                                                                                     |                                    |
|----|-------------------------------|-----|-------------------------------------------------------------------------------------------------------------------------------------------------------------------------------------------------------------------------------------------------------------------------------------|------------------------------------|
| 1  | Consent or assent             | 26a | Who will obtain informed consent or assent from potential trial participants or authorised surrogates, and how (see Item 32)                                                                                                                                                        | ___ 14 ___                         |
| 2  |                               |     |                                                                                                                                                                                                                                                                                     |                                    |
| 3  |                               |     |                                                                                                                                                                                                                                                                                     |                                    |
| 4  |                               | 26b | Additional consent provisions for collection and use of participant data and biological specimens in ancillary studies, if applicable                                                                                                                                               | ___ 14 ___                         |
| 5  |                               |     |                                                                                                                                                                                                                                                                                     |                                    |
| 6  |                               |     |                                                                                                                                                                                                                                                                                     |                                    |
| 7  | Confidentiality               | 27  | How personal information about potential and enrolled participants will be collected, shared, and maintained in order to protect confidentiality before, during, and after the trial                                                                                                | ___ 14 ___                         |
| 8  |                               |     |                                                                                                                                                                                                                                                                                     |                                    |
| 9  |                               |     |                                                                                                                                                                                                                                                                                     |                                    |
| 10 | Declaration of interests      | 28  | Financial and other competing interests for principal investigators for the overall trial and each study site                                                                                                                                                                       | ___ 1 ___                          |
| 11 |                               |     |                                                                                                                                                                                                                                                                                     |                                    |
| 12 |                               |     |                                                                                                                                                                                                                                                                                     |                                    |
| 13 | Access to data                | 29  | Statement of who will have access to the final trial dataset, and disclosure of contractual agreements that limit such access for investigators                                                                                                                                     | ___ 14 ___                         |
| 14 |                               |     |                                                                                                                                                                                                                                                                                     |                                    |
| 15 |                               |     |                                                                                                                                                                                                                                                                                     |                                    |
| 16 |                               |     |                                                                                                                                                                                                                                                                                     |                                    |
| 17 | Ancillary and post-trial care | 30  | Provisions, if any, for ancillary and post-trial care, and for compensation to those who suffer harm from trial participation                                                                                                                                                       | ___ 14 ___                         |
| 18 |                               |     |                                                                                                                                                                                                                                                                                     |                                    |
| 19 |                               |     |                                                                                                                                                                                                                                                                                     |                                    |
| 20 | Dissemination policy          | 31a | Plans for investigators and sponsor to communicate trial results to participants, healthcare professionals, the public, and other relevant groups (eg, via publication, reporting in results databases, or other data sharing arrangements), including any publication restrictions | ___ 14 ___                         |
| 21 |                               |     |                                                                                                                                                                                                                                                                                     |                                    |
| 22 |                               |     |                                                                                                                                                                                                                                                                                     |                                    |
| 23 |                               |     |                                                                                                                                                                                                                                                                                     |                                    |
| 24 |                               | 31b | Authorship eligibility guidelines and any intended use of professional writers                                                                                                                                                                                                      | Not applicable                     |
| 25 |                               |     |                                                                                                                                                                                                                                                                                     |                                    |
| 26 |                               | 31c | Plans, if any, for granting public access to the full protocol, participant-level dataset, and statistical code                                                                                                                                                                     | Not applicable                     |
| 27 |                               |     |                                                                                                                                                                                                                                                                                     |                                    |
| 28 |                               |     |                                                                                                                                                                                                                                                                                     |                                    |
| 29 | <b>Appendices</b>             |     |                                                                                                                                                                                                                                                                                     |                                    |
| 30 |                               |     |                                                                                                                                                                                                                                                                                     |                                    |
| 31 | Informed consent materials    | 32  | Model consent form and other related documentation given to participants and authorised surrogates                                                                                                                                                                                  | See rules of the Ethical Committee |
| 32 |                               |     |                                                                                                                                                                                                                                                                                     |                                    |
| 33 |                               |     |                                                                                                                                                                                                                                                                                     |                                    |
| 34 | Biological specimens          | 33  | Plans for collection, laboratory evaluation, and storage of biological specimens for genetic or molecular analysis in the current trial and for future use in ancillary studies, if applicable                                                                                      | Not applicable                     |
| 35 |                               |     |                                                                                                                                                                                                                                                                                     |                                    |
| 36 |                               |     |                                                                                                                                                                                                                                                                                     |                                    |

\*It is strongly recommended that this checklist be read in conjunction with the SPIRIT 2013 Explanation & Elaboration for important clarification on the items. Amendments to the protocol should be tracked and dated. The SPIRIT checklist is copyrighted by the SPIRIT Group under the Creative Commons "[Attribution-NonCommercial-NoDerivs 3.0 Unported](https://creativecommons.org/licenses/by-nc-nd/3.0/)" license.



# BMJ Open

## Study protocol for a randomised double-blinded, sham-controlled, prospective, cross-over clinical trial of vagal neuromodulation for pain treatment in patients with chronic pancreatitis

|                                 |                                                                                                                                                                                                                                                                                                                                                                                                                                                                                                                                                                                                                                                                                                                                                                                                                                                                                             |
|---------------------------------|---------------------------------------------------------------------------------------------------------------------------------------------------------------------------------------------------------------------------------------------------------------------------------------------------------------------------------------------------------------------------------------------------------------------------------------------------------------------------------------------------------------------------------------------------------------------------------------------------------------------------------------------------------------------------------------------------------------------------------------------------------------------------------------------------------------------------------------------------------------------------------------------|
| Journal:                        | <i>BMJ Open</i>                                                                                                                                                                                                                                                                                                                                                                                                                                                                                                                                                                                                                                                                                                                                                                                                                                                                             |
| Manuscript ID                   | bmjopen-2019-029546.R1                                                                                                                                                                                                                                                                                                                                                                                                                                                                                                                                                                                                                                                                                                                                                                                                                                                                      |
| Article Type:                   | Protocol                                                                                                                                                                                                                                                                                                                                                                                                                                                                                                                                                                                                                                                                                                                                                                                                                                                                                    |
| Date Submitted by the Author:   | 04-Jun-2019                                                                                                                                                                                                                                                                                                                                                                                                                                                                                                                                                                                                                                                                                                                                                                                                                                                                                 |
| Complete List of Authors:       | Muthulingam, Janusiya Anajan; Aalborg University Hospital , Mech-Sense, Department of Radiology; Aalborg University, Department of Clinical Medicine<br>Olesen, Søren; Aalborg University Hospital, Mech-Sense, Department of Gastroenterology and Hepatology; Aalborg University, Department of Clinical Medicine<br>Hansen, Tine; Aalborg University Hospital, Denmark, Mech-Sense, Department of Radiology; Aalborg University, Department of Clinical Medicine<br>Brock, Christina; Aalborg University, Department of Clinical Medicine; Aalborg University Hospital<br>Drewes, Asbjørn; Mech-Sense, Department of Gastroenterology and Hepatology, Aalborg University Hospital, ; Department of Clinical Medicine, Aalborg University,<br>Frøkjær, Jens Brøndum; Mech-Sense, Department of Radiology, Aalborg University Hospital; Aalborg University, Department of Clinical Medicine |
| <b>Primary Subject Heading</b>: | Gastroenterology and hepatology                                                                                                                                                                                                                                                                                                                                                                                                                                                                                                                                                                                                                                                                                                                                                                                                                                                             |
| Secondary Subject Heading:      | Neurology                                                                                                                                                                                                                                                                                                                                                                                                                                                                                                                                                                                                                                                                                                                                                                                                                                                                                   |
| Keywords:                       | Viscera, Clinical trials < THERAPEUTICS, Gastrointestinal disease, Chronic pain, Transcutaneous electrical nerve stimulation                                                                                                                                                                                                                                                                                                                                                                                                                                                                                                                                                                                                                                                                                                                                                                |
|                                 |                                                                                                                                                                                                                                                                                                                                                                                                                                                                                                                                                                                                                                                                                                                                                                                                                                                                                             |

SCHOLARONE™  
Manuscripts

1  
2  
3  
4  
5 1 **Study protocol for a randomised double-blinded, sham-controlled,**  
6  
7 2 **prospective, cross-over clinical trial of vagal neuromodulation for pain**  
8  
9 3 **treatment in patients with chronic pancreatitis**  
10  
11  
12 4

13  
14 5 Janusiya Anajan Muthulingam<sup>1,2</sup>, Søren Schou Olesen<sup>2,3</sup>, Tine Maria Hansen<sup>1,2</sup>, Christina Brock<sup>2,4</sup>, Asbjørn  
15 6 Mohr Drewes<sup>2,3</sup> and Jens Brøndum Frøkjær<sup>1,2</sup>  
16  
17

18 7  
19  
20 8 1 Mech-Sense, Department of Radiology, Aalborg University Hospital, Aalborg, Denmark

21 9 2 Department of Clinical Medicine, Aalborg University, Aalborg, Denmark

22 10 3 Centre for Pancreatic Diseases, Department of Gastroenterology & Hepatology, Aalborg University Hospital,  
23 11 Aalborg, Denmark

24 12 4 Mech-Sense, Department of Gastroenterology & Hepatology, Aalborg University Hospital, Aalborg,  
25 13 Denmark  
26  
27  
28  
29  
30 14

31 15 **Trial registration number:** The study is registered at [www.clinicaltrials.gov](http://www.clinicaltrials.gov): NCT03357029

32 16 **Protocol version:** Protocol version 6, 13<sup>th</sup> of September 2017.

33 17 **Funding:** The study is conducted as a sponsor-investigator initiated study with financial support from  
34 18 Independent Research Fund Denmark (DFR – 7016-00073).  
35

36 19 **Study Sponsor-investigator and corresponding author:** Professor Jens Brøndum Frøkjær, MD, PhD

37 20 Mech-Sense, Department of Radiology

38 21 Aalborg University Hospital

39 22 P.O. Box 365, DK-9100 Aalborg, Denmark

40 23 Telephone: +45 97665105

41 24 E-mail: [jebf@rn.dk](mailto:jebf@rn.dk)

42 25 **Contributors:** JBF, JM, SSO, TMH, CB and AMD conceived and designed the study and participated in  
43 26 logistical planning of the study. JM drafted the initial version of the manuscript and is collecting the data. All  
44 27 authors made significant contributions to the development and conceptualization of the protocol. All authors  
45 28 reviewed the draft versions of the manuscript and have read and approved the final manuscript.  
46

47 29 **Competing interests:** None

48 30 **Word count:** Abstract: 243 words; main text: 4226 words; Figures 3; table 1; References 50  
49  
50  
51  
52  
53  
54  
55  
56  
57  
58  
59  
60

## **Abstract**

**Introduction:** The management of chronic pancreatitis (CP) is challenging and requires a personalized approach focused on the individual patient's main symptoms. Abdominal pain is the most prominent symptom in CP, where central pain mechanisms, including sensitization and impaired pain modulation, often are involved. Recent clinical studies suggest that vagal nerve stimulation (VNS) induce analgesic effects through modulation of central pain pathways. This study aims to investigate the effect of two-weeks transcutaneous VNS (t-VNS) on clinical pain in CP patients, in comparison to the effect of sham treatment.

**Methods and analysis:** Twenty-one CP patients will be enrolled in this randomized, double-blinded, single-centre, sham-controlled, cross-over study. The study has two treatment periods: A two-week active t-VNS using GammaCore® device and a two-week treatment with a sham device. During both treatment periods, the patients are instructed to self-administer VNS bilaterally to the cervical vagal area, three times per day. Treatment periods will be separated by two weeks. During the study period patients will record their daily pain experience in a diary (primary clinical endpoint). In addition, all subjects will undergo testing which will include magnetic resonance imaging (MRI), quantitative sensory testing (QST), cardiac vagal tone (CVT) assessment and collecting blood samples, before and after the two treatments to investigate mechanisms underlying VNS effects. The data will be analysed using the principle of intention-to-treat.

**Ethics and dissemination:** The regional Ethics committee has approved the study: N-20170023. Results of the trial will be submitted for publication in peer-reviewed journals.

**Trial registration:** The study is registered at [www.clinicaltrials.gov](http://www.clinicaltrials.gov): NCT03357029

**Key words:** Transcutaneous electrical nerve stimulation; Viscera; Chronic Pain; Gastrointestinal disease; Clinical trials

1  
2  
3  
4  
5  
6  
7  
8  
9  
10  
11  
12  
13  
14  
15  
16  
17  
18  
19  
20  
21  
22  
23  
24  
25  
26  
27  
28  
29  
30  
31  
32  
33  
34  
35  
36  
37  
38  
39  
40  
41  
42  
43  
44  
45  
46  
47  
48  
49  
50  
51  
52  
53  
54  
55  
56  
57  
58  
59  
60

55 **Strengths and limitations of the study:**

- 56 • This is the first study to examine the analgesic effect of transcutaneous vagal nerve stimulation (t-VNS)  
57 in chronic pancreatitis patients with abdominal pain.
- 58 • A randomized double-blinded, sham-controlled, prospective cross-over design will be used with both  
59 clinical and experimental outcomes, which allow for exploration of the mechanisms underlying putative  
60 clinical effects.
- 61 • The study investigates the effect of two weeks of t-VNS treatment; hence, further studies are needed to  
62 explore long-term effects.
- 63 • The single-centre design may limit generalizability of the study results.

For peer review only

## 64 **INTRODUCTION**

65 Chronic pancreatitis (CP) is a disease characterized by progressive pancreatic inflammation and fibrosis,  
66 resulting in damage to and loss of exocrine (acinar), endocrine (islet cells), and ductal cells<sup>1</sup>. Chronic  
67 abdominal pain is the dominating symptom in CP and is present in up to 70% of patients<sup>2</sup>. Pain is associated  
68 with reduced quality of life, increased hospitalization frequencies and thus a significant socioeconomic  
69 burden<sup>3</sup>.

70 The aetiology of pain in CP is increasingly better understood and often involves multiple mechanisms in the  
71 individual patient. In addition to local pathology in the pancreatic gland and its surrounding tissues, central  
72 pain pathways undergo neuroplastic changes during the course of CP. These involve sensitization of central  
73 pain pathways, functional and structural reorganization of the brain as well as impaired efficacy of endogenous  
74 pain modulatory pathways. These neural abnormalities can be targeted by different pharmacological therapies,  
75 but their effect is often limited and associated with significant side-effects in many patients. This has led to an  
76 increased interest in complementary treatment modalities for pain in patients with CP. In a model of  
77 oesophageal hyperalgesia, we have shown that physiological deep breathing enhanced vagal tone, which in  
78 response increased the pain detection threshold<sup>4</sup>. In addition, this effect was abolished by atropine  
79 administration thereby proving that enhanced parasympathetic tone leads to prevention of oesophageal pain  
80 hypersensitivity<sup>4</sup>. Also, we have previously shown an improved gastrointestinal motility and decreased pain  
81 sensitivity following non-invasive VNS of the auricular branch of the vagal nerve in conjunction with a deep-  
82 breathing approach in healthy subjects<sup>5</sup>. Another non-pharmacological treatment modality is transcutaneous  
83 vagal nerve stimulation (t-VNS), in which short bursts of electrical energy are directed onto the vagal nerve at  
84 the neck<sup>6</sup> (Figure 1). T-VNS has been shown to induce analgesic<sup>7,8</sup> and anti-inflammatory effects in healthy  
85 individuals<sup>9</sup> and different diseases. The exact mechanisms by which VNS modulates chronic pain is unclear,  
86 however it has been proposed that the analgesic effect is potentially mediated by vagal afferents that inhibit  
87 spinal nociceptive reflexes and transmission<sup>10</sup>. Specifically, the analgesic effects is mediated through vagal  
88 afferent modulation in the nucleus tractus solitaries, raphe magnus, locus ceruleus, amygdala and  
89 periaqueductal grey, which are involved in the descending inhibition of pain<sup>10,11</sup>. It has also been demonstrated  
90 that VNS inhibits spinal cord neurons below C3 but excites neurons between C1 and C3, suggesting that  
91 propriospinal neurons from high segments play an essential role in vagally mediated antinociception. Thus,  
92 VNS appears to induce neuromodulatory antinociception through peripheral and central, ascending and  
93 descending pathways<sup>12</sup>. Also, the non-pharmacological treatment is FDA-approved for the acute treatment in  
94 migraine patients<sup>13</sup>.

95 This study aims to examine the analgesic effect of a two-week t-VNS in patients with CP and to explore the  
96 underlying analgesic mechanisms using advanced neuroimaging techniques and quantitative sensory testing  
97 (QST). We hypothesized that two weeks t-VNS treatment will induce clinically relevant pain relief compared  
98

1  
2  
3  
4 98 to sham treatment, and that these effects are mediated via modulation of central pain pathways. To answer the  
5  
6 99 overall study aims, we have two clinical and two experimental objectives:  
7

- 8 100 1) The primary clinical objective is to assess the effect of t-VNS on the daily pain experience documented in  
9  
10 101 a pain diary in chronic pancreatitis patients.  
11 102 2) Secondary clinical objectives are to document changes in quality of life and daily functioning.  
12  
13 103 3) The experimental objective is to assess the effect of t-VNS on A) resting state brain function assessed by  
14  
15 104 magnetic resonance imaging (MRI), and B) brain metabolites assessed by magnetic resonance  
16 105 spectroscopy.  
17  
18 106 4) Secondary experimental objectives are to assess the effect of t-VNS on A) experimental pain stimuli  
19 107 documented by QST, B) cardiac vagal tone and C) pro-inflammatory cytokine profiles obtained from  
20  
21 108 blood samples.  
22  
23  
24  
25  
26  
27  
28  
29  
30  
31  
32  
33  
34  
35  
36  
37  
38  
39  
40  
41  
42  
43  
44  
45  
46  
47  
48  
49  
50  
51  
52  
53  
54  
55  
56  
57  
58  
59  
60

## **METHODS AND ANALYSES:**

### **Study design**

Randomised, single-centre, double-blinded, prospective, sham-controlled, cross-over study. The study was approved by the North Denmark Region Committee on Health Research Ethics with the protocol number N-20170023 and has been registered with ClinicalTrials.gov (NCT03357029). The trial will be performed at Aalborg University Hospital and will be reported according to the Consolidated Standards of Reporting Trials (CONSORT)<sup>14</sup>. The study protocol follows the Standard Protocol Items: Recommendations for Interval Trials (SPIRIT) statement<sup>15</sup>.

All patients undertake the t-VNS treatment using an active GammaCore-S, 300 treatments (10009-00603) device (ElectroCore LLC; Basking Ridge, NJ, USA) and sham treatment using a sham-device (10009-00603 P) which is identical in appearance GammaCore.

Half of the patients will be randomized to start with two-week t-VNS treatment, followed by a two-week washout period. Then, this group will be reallocated to sham treatment. The other half of patients will do the study periods in opposite order (sham treatment followed by t-VNS treatment). The two-week washout period has been used in previous studies of trans-cranial neuromodulation<sup>16</sup> and was shown to be sufficient to reset the effects of neuromodulation<sup>17</sup>. Each patient will be scheduled for four identical hospital visits (before and after each treatment period). The visits consist of 1) Fulfilment of questionnaires, 2) Collection of blood samples, 3) brain MRI scan, 4) QST, and 5) assessment of CVT (Figure 2, Table 1).

### **Study participants**

Patients will be recruited via personal correspondence and during visits at the outpatient clinic. Patients who agree to participate in the study and fill in an informed consent will be invited to participate in the study. A screening session and physical examination prior to inclusion will be conducted by a medical doctor including relevant medical and medication history and screening against the eligibility criteria. All patients will be asked to continue their medication during the entire study, and any changes needed in pain medication will be noted in the diary.

### **Inclusion criteria and exclusion criteria**

Patients from the age of 18 years will be included in the study. They will have a clinical diagnosis of CP based on the Mayo clinical diagnostic criteria<sup>18</sup>. All aetiological types of CP patients would be included (incl. alcohol, nicotine, hereditary, efferent duct factors, and immunological aetiologies). The patients must suffer from chronic abdominal pain characteristics for CP, meet the criteria for chronic pain (pain  $\geq$  3 days per week for at least 3 months) and must consider their pain as insufficiently treated with their prescribed analgesic

1  
2  
3  
4 141 treatment. Additionally, the patients must be willing and able to comply with the scheduled visits, treatment  
5  
6 142 plan, laboratory tests, and other study procedures. Finally, the patient must sign the informed consent and  
7  
8 143 power of attorney document.

9 144 Patients will be excluded if they have any clinically significant abnormalities that may increase the risk  
10  
11 145 associated with trial participation or may interfere with the interpretation of the trial results. Also, patients with  
12 146 alcohol and illegal drug dependence patients, cardiovascular diseases, low blood pressure (<100/60mmHg),  
13  
14 147 elevated intracranial pressure will be excluded. Additionally, patients who are participating in another  
15 148 intervention study, patients who are pregnant or intend to become pregnant, and patients who suffer from  
16  
17 149 painful conditions other than CP that make them unable to distinguish the pain associated with CP from chronic  
18  
19 150 pain of other origin will be excluded. Patients will also be excluded if there are any contraindications for MRI  
20 151 (incl. cardiac pacemaker, implantable metallic components, etc.), have known neuropathy, or previous vagal  
21  
22 152 nerve surgery (Table 1).

23 153  
24  
25 154 Participants can withdraw from the study at any time they may wish. Patients will be withdrawn from the study  
26  
27 155 if they do not meet for the scheduled study visits or miss a treatment period, and if they do not maintain  
28 156 inclusion/exclusion criteria.

### 31 158 **Interventions**

32  
33 159 Study interventions are t-VNS treatment and sham treatment (Figure 2 & 3). Prior to receiving the t-VNS  
34  
35 160 treatment/sham treatment, the standard care must be stable.

36  
37 161 Patients will be thoroughly instructed to use the device, and when the healthcare providers are confident that  
38  
39 162 the patient is capable to use the device independently, the device will be handed over to the patient. T-VNS  
40  
41 163 is administered by using a handheld device (GammaCore; ElectroCore LLC; Basking Ridge, NJ, USA), which  
42 164 consists of a battery powered portable stimulator with a digitally controlled user-interface that controls the  
43  
44 165 signal amplitude and two gel covered (Sigma gel, Parker Laboratories, NJ, USA) contact electrodes which  
45 166 deliver electrical stimulation to the cervical vagal nerve. One dose corresponds to 120 seconds of t-VNS to  
46  
47 167 the left cervical vagal nerve followed by 120 seconds of t-VNS to the right cervical vagal nerve, with the  
48 168 amplitude of simulation titrated to achieve mild pulling of the ipsilateral oral commissure<sup>19</sup>. Bilateral  
49  
50 169 stimulation has shown to be effective in previous studies with GammaCore<sup>20,21</sup>. The patient self-administers  
51  
52 170 the treatment, using the device at home three times per day (morning, afternoon, and evening) for two weeks.  
53 171 Previous studies with Gamma-Core, have shown that three doses per day have been effective<sup>13,22</sup>.

54  
55 172 The stimulation device is positioned anterior to the sternocleidomastoid muscle, over the carotid artery as this  
56  
57 173 runs in close proximity with the vagal nerve. The active Gamma-Core device produces a low-voltage electrical  
58  
59 174 signal comprising a 5 kHz sine wave burst lasting for 1 millisecond (five sine waves, each lasting 0.2  
60



1  
2  
3  
4 175 millisecond), with such bursts repeated once every 40 milliseconds (25 Hz), generating a 24 V peak voltage  
5  
6 176 and 60 mA peak output current. Those parameters have been used to activate the vagal nerve in  
7  
8 177 electrophysiological studies<sup>20,21</sup>.

9  
10 178 To mimic the sensation of the active treatment, the sham-device will provide vibration<sup>23</sup>. The appearance,  
11  
12 179 weight, visual and audible feedback, and user application are identical for the sham and t-VNS devices.  
13  
14 180 However, the sham device produces a low-frequency (0.1 Hz) biphasic signal that does not stimulate the vagal  
15  
16 181 nerve or generally cause muscle contractions<sup>24</sup>. Additionally, both devices will display a numeric value  
17  
18 182 between 1 and 40, signifying the intensity of the stimulation. The maximum intensity per stimulation is 40 for  
19  
20 183 both devices (Figure 1). The intensity of the stimulation can vary from patient to patient. The intensity for  
21  
22 184 stimulation is reached by increasing the stimulation to the maximum the patient can tolerate without excessive  
23  
24 185 pain. Some patients can tolerate less than other patients depending on the pain level. Therefore the dosage of  
25  
26 186 every stimulation is patient-dependent<sup>25</sup>.

27  
28 187 Compliance will be assessed by reading the remaining doses displayed at the device after each treatment  
29  
30 188 period. Additionally, the patients will be asked to keep a record of the stimulation intensity of the doses applied  
31  
32 189 at each stimulation. In addition, questions on compliance will be asked after each treatment period. Finally,  
33  
34 190 adherence will be recorded by patients' diary.

35  
36 191 During the study periods the patient will continue their standard care, without changes in their current pain  
37  
38 192 treatment.

### 39 193

### 37 194 **Randomization, sequence generation and allocation concealment**

38  
39 195 Once eligibility and consent have been approved and completed, randomization will occur using a  
40  
41 196 randomization list generated by an automatic web-based randomization program. Patients will be randomly  
42  
43 197 assigned to VNS/sham or sham/VNS using block randomisation, allowing seven patients at the time to be  
44  
45 198 randomised in equal proportions for the order of active t-VNS or sham stimulation. The randomization order  
46  
47 199 will be kept in closed envelopes; therefore, patients will get their assignment according to the order of entrance  
48  
49 200 in the study. This process will be carried out by a member of the research team who is not involved in the  
50  
51 201 recruitment process or conduction of the study.

52  
53 202 An unblinded researcher will be involved in delivering the medical device according to the randomisation  
54  
55 203 schedule. The sequence will follow a 1:1 sequential design, in a double-blinded fashion. Additionally, the  
56  
57 204 outcome assessor (data analyst) will be blinded during the statistical analyses of experimental outcomes. A  
58  
59 205 series of numbered, sealed, envelopes will be used to ensure concealed allocation.

### 58 206 **Blinding**

Both, active and sham devices are labelled with a serial number and not outwardly identified as active or sham. All researchers involved in the data collection and MRI analysis will be blinded to the treatment allocation group until after analyses are performed at the completion of the trial. Additionally, all patients are blinded, and they do not know that the sham treatment is an inactive treatment. Particularly, patients will be informed that they have to undergo two different interventions with two different devices, and the purpose of this study is to investigate the most effective treatment.

Manufacturing and preparation of the medical devices are handled by an external good manufacturing practice-accredited facility (ElectroCore). As the patients do not know that the sham treatment is an inactive treatment, we will not be able to ask the patient “do you think you received active or inactive treatment?”, thus we will not be able to assess and determine if the blinding was effective.

Unblinding is only permissible if a patient experiences any serious adverse events and that the investigator/doctor judge that it is essential to know the treatment allocation in order to treat the patient appropriately.

### **Primary clinical outcome measures**

The primary clinical efficacy parameter to be evaluated is 30% pain relief. This is assessed as changes in the daily experience of pain, which will be measured using a patient pain diary based on the numeric rating scale (NRS) (1 = no pain, 10 = worst pain imaginable). Patients will be asked to score daily pain levels in the diary for eight weeks (including one week before the first treatment period and one week after the last study period, Figure 2 and Figure 3), with one NRS value for the average pain over the previous 24 hours and one NRS value for the worst pain over the previous 24 hours.

### **Secondary clinical outcome measures**

Quality of life questionnaire, C30, version 3.0 (QoLQ-C30)<sup>26</sup>, the brief pain inventory – short form (BPI-SF) questionnaire<sup>27</sup>, and Patient Global Impression of Changes<sup>28</sup> questionnaire (PGIC) are secondary clinical outcomes. Patient will complete QoLQ-C30 and BPI-SF questionnaire before and after each treatment period, while the PGIC questionnaire will only be fulfilled after the treatment periods. The QoLQ-C30 questionnaire is composed of both multi-item scales and single-item measures. These include five functional scales, three symptom scales, a global health status, and six single items. The BPI-SF questionnaire rapidly assesses the severity of pain and its impact on daily functioning. Finally, the PGIC questionnaire evaluates all aspects of patients' health and assesses if there has been an improvement or decline in the overall clinical status.

## Experimental outcome measures

Resting state functional MRI will be employed to detect brain activity and functional connectivity changes based on BOLD signals before and after treatment of each patient. Additionally, magnetic resonance spectroscopy in anterior cingulate cortex, prefrontal cortex, parietal, and insula will also be performed in order to investigate changes in brain metabolites before and after each treatment.

MRI data will be acquired on a 3 Tesla MR scanner (Signa HDxt, General Electric, Milwaukee, WI, USA) equipped with an 8 channel standard head coil. Scan time for a structural scan will be 5½ minutes. Following parameters will be used for the structural scan: 150 slices, FOV 250 mm, echo time 3.6 millisecond, repetition time 9.0 millisecond, flip angle 14°, resolution 0.78x0.78 mm, matrix size 320x320 mm, slice thickness 1 mm, full head coverage, with no gap. Functional scans will be acquired with following parameters: gradient echo, echo planar (Gr-EPI), 192 volumes, 37-40 slices, FOV=240 mm, echo time=30 millisecond, repetition time=2000 millisecond, flip angle=90°, matrix size=64x64, resolution=3.75x3.75 mm, slice thickness 3.8 mm, no gap, axial slices. The scan time for functional MRI will be 6 minutes and 32 seconds. Additionally, MRI spectroscopy will be used to estimate brain metabolites in the anterior cingulate cortex, prefrontal cortex, parietal, and insula. For MRI spectroscopy, single voxel PRESS (Point RESolved Spectroscopy) will be acquired. Following parameters will be used: Echo time=30 millisecond, repetition time=2000 millisecond, scan time will be 5 minutes, and the total number of scans will be 128. Bandwidth will be 5,000 Hz. A 20x20x20 mm voxel of interest will be positioned on a sagittal T2-weighted fast spin echo sequence. Repetition time= 4600 millisecond and echo time=102 millisecond, matrix 384x256, slice thickness 3 mm, gap 0.3 mm), in the midline in the ACC with the inferior border along the anterior-posterior commissure line.

## Secondary experimental outcome measures

Secondary outcomes are changes in QST, CVT and pro-inflammatory cytokine profiles.

QST includes temporal summation<sup>29</sup>, pressure pain thresholds<sup>29,30</sup> and conditioned pain modulation (CPM)<sup>31</sup>. Temporal summation demonstrates an increase perception of pain to repetitive pain stimuli<sup>29</sup>. Temporal summation will be recorded in the dermatome T10 (pancreatic area) and control area (dominant forearm) using the PinPrick stimulator, 256 mN (MRC Systems GmbH Medizintechnische Systeme, Germany).

The pressure pain threshold and pressure pain tolerance will be determined by pressing an electronic pressure algometer (Somedic AB, Stockholm, Sweden) on specified muscle groups: C5 - clavícula, T10 – dorsum, T10 – abdomen, L1 – anterior superior iliac spine, and rectus femoris. Also, pressure pain threshold and pressure pain tolerance will be measured on bone. For the muscle pressure stimulation, the probe has a surface area of

1  
2  
3  
4 269 1 cm<sup>2</sup>. Pressure will be increased at a rate of 30 kPa/sec until the pressure pain threshold is reached. For the  
5  
6 270 bone pressure stimulation, a probe with 3.1 mm<sup>2</sup> (Aalborg University, Denmark) will be applied.  
7

8 271 CPM is a clinically measurable form of descending pain modulation<sup>31</sup> that can be induced experimentally by  
9  
10 272 a conditioning stimulus (the cold pressor test) and quantified by applying a “test-pain” (pressure stimulation  
11 273 of the right quadriceps musculature) before and after its induction<sup>32</sup>. The patient will lower their dominant  
12  
13 274 hand in cold water (2°C for maximum two minutes). The difference in pressure stimulus intensity (pain  
14  
15 275 threshold) before and after induction of cold pressor pain provides a quantitative index of CPM capacity for  
16 276 the individual patient. The techniques used for pressure stimulation and cold pressor test described above will  
17  
18 277 be combined to measure CPM.  
19

20 278 CVT is a beat-to-beat measure of brainstem efferent vagal activity, which is assessed by heart rate variability  
21  
22 279 measurement and reflects the contribution of the vagal nerve to cardiac functioning. In this particular test,  
23 280 changes in R-R interval would be measured non-invasively using eMotion Faros 180 device<sup>33</sup>.  
24

25 281 Blood samples are collected to explore changes in pro-inflammatory cytokines profiles. 26 ml blood is  
26  
27 282 collected, and the following inflammatory state and macrophage markers will be assessed: interferon- $\gamma$ ,  
28  
29 283 interleukin-8 (IL-8), IL-10, IL-12p70, IL-13, IL-1b, IL-2, IL-4, IL-6, tumour necrosis factor-  $\alpha$  (TNF- $\alpha$ ),  
30 284 monocyte chemoattractant protein-1 (MCP-1), and high sensitivity C-reactive protein (hs-CRP).  
31

### 32 285 33 34 286 **Statistical power**

35  
36  
37 287 The study is powered to detect a minimal difference between the sham treatment and the active treatment of  
38  
39 288 30% on the average clinical pain score at the end of the two study periods. Based on a standard deviation of  
40 289 40% we determine that a study with 16 patients in a cross-over design is needed, with a power of 80%, and  
41  
42 290 the use of a two-sided significance level of 0.05 (alpha). This calculation (standard deviation) is based on data  
43 291 from a study with CP patients, who received pregabalin treatment, which related to an improvement in clinical  
44  
45 292 measures of the pain score<sup>34</sup>. To allow for a dropout rate of 25%, we will aim to recruit 21 CP patients. The  
46 293 sample size was calculated using statistical software package STATA 15.0 (StataCorp LP, College Station)<sup>35</sup>.  
47

### 48 294 49 50 51 295 **Harms and adverse events**

52  
53 296 We do not anticipate this project causing any harm or discomfort to the patients, and we will ensure that our  
54  
55 297 patients participate in the study voluntarily.  
56 298  
57  
58  
59  
60

1  
2  
3  
4 299 Information about adverse events and serious adverse events will be collected from the date of inclusion and  
5  
6 300 in all following contacts with the study subject throughout the project. Adverse events will be documented on  
7  
8 301 the patient file and on the electronic case report form. All types of adverse events will be notified to the device  
9 302 manufacturer ElectroCore and to the Danish Health Authorities by use of Manufactures Incident Report Form.  
10  
11 303

### 12 304 **Data collection and data management**

13  
14 305 All instruments in the questionnaires are validated<sup>26,27</sup>. Additionally, all data collectors are highly experienced  
15  
16 306 registered research nurses, radiographers, and researchers who have been trained in good clinical practice  
17  
18 307 (GCP). There will be regular meetings between the data collectors, monitor, principal investigator and other  
19 308 co-researchers involved in the project. All paper protocols will be kept safe and transferred to a computerised  
20  
21 309 database. The questionnaires will be checked for errors and missing data by research staff. Data entries are  
22 310 double-checked against the paper questionnaires.  
23

24  
25 311 During trial conduct, the Good Clinical Practice unit (GCP, Aalborg, Denmark) will conduct periodic  
26 312 monitoring of all signed consents at monitoring visits to ensure that the protocol and GCP standards are  
27  
28 313 followed. The monitors may review source documents and medical records to confirm that data recorded on  
29 314 Case Report Form is accurate. Thus, GCP monitoring includes all signed consents, signed power of attorney,  
30  
31 315 and AE.  
32

33 316 Criteria for the termination of the trial is, when patients according to the sample size with valid data are  
34  
35 317 recorded. If the study fails to recruit adequate patients according to the sample size by end of 2019, the study  
36 318 will be terminated.  
37

### 38 319 39 40 320 **Data analysis**

41 321 Both descriptive and analytical statistics will be used in order to compare groups and for analyses of outcomes  
42  
43 322 over time including changes therein. All data will be presented as mean  $\pm$  standard deviation and summarized  
44 323 in frequency tables, unless otherwise indicated. We will use Research Electronic Data Capture (REDCap)<sup>36</sup> to  
45  
46 324 store the data and the statistical software package STATA to perform statistical analysis. We will use mixed  
47 325 ANOVA for the inferential statistic of the parametric data, with Tukey's and/or Bonferroni post hoc tests for  
48  
49 326 the primary clinical endpoints. Significance level will be set as  $\alpha \leq 0.05$ .  
50  
51 327

52 328 The principal analysis of clinical endpoints will be by intention-to-treat, meaning that all randomized patients  
53  
54 329 are included in their initially assigned study arm, regardless of adherence to study protocol. Experimental  
55 330 endpoints will be analysed by per-protocol, meaning that only patients completing the experimental setup are  
56  
57 331 included. The primary endpoints will be compared between the treatment groups.  
58  
59  
60

1  
2  
3  
4 332 Analysis of MRI data: We will use standard pre-processing procedures in Statistical Parametric Mapping  
5 (SPM) (<http://www.fil.ion.ucl.ac.uk/spm/>) before conducting the statistical analysis. Moreover, we will use a  
6 333 mixed effects design in which within-subject effects between the two treatments (before and after both  
7 334 treatments) responses brain activity and group effects will be modelled. For MR spectroscopy, specific  
9 335 metabolites changes will be assessed in pain related brain regions<sup>37</sup>.  
10 336  
11 337

12 338 The rest of the data, like demographic data, changes in circulating cytokines, and others, will be used  
13 339 descriptively and as input to regression and mixed model analyses. The final statistical analysis plan, providing  
14 340 details of the analysis and presentation of the results will be finalized before initiating any statistical analysis.  
15 341  
16 342

### 17 341 18 342 **Patient and public involvement**

19 343 The study was designed based on the need for new therapeutic options for CP patients and the literature relating  
20 344 to pain management in chronic pancreatitis, as described in the introduction. The outcomes, such as pain scores  
21 345 and MRI brain scans were deliberately chosen in order to assess the potential effect of t-VNS treatment both  
22 346 subjectively (patient-oriented) and objectively. Furthermore, no patients were directly involved in the design,  
23 347 recruitment to or conduct of the study. However, an expert/chief doctor specialized in chronic pancreatitis  
24 348 disease is an associated investigator of the study (SSO). The results and findings gathered from this study will  
25 349 be provided to the patients on request in the form of a written report.  
26 350  
27 351

28 352 There was no public involvement in the study design.  
29 353  
30 354  
31 355  
32 356  
33 357  
34 358  
35 359  
36 360  
37 361  
38  
39  
40  
41  
42  
43  
44  
45  
46  
47  
48  
49  
50  
51  
52  
53  
54  
55  
56  
57  
58  
59  
60



## **DISCUSSION**

To the best of our knowledge, there are no randomized, sham controlled, studies investigating the effect of t-VNS on clinical pain in patients with CP. We expect the study to provide clinical evidence of the analgesic effect of VNS and to elucidate its underlying mechanisms of action. This may pave the road for non-pharmacological treatment of pain associated with CP and the findings of the study may be generalizable to chronic pain conditions *per se*.

Previous studies have shown structural and functional alterations of the CNS in CP patients with abdominal pain<sup>38-42</sup>. The CNS mechanisms may have the ability to recover by targeting treatment at plasticity mechanisms and reorganization of neuronal pathways leading to improvement of clinical symptoms<sup>43</sup>. VNS treatment has emerged promising technique in stimulating neural reorganization and synaptic plasticity in cortical and subcortical networks, leading to modulation of serotonergic and noradrenergic pain inhibitory pathways<sup>44</sup>. Those mechanisms might alter and regenerate the neural connectivity in regions responsible for pain<sup>45-47</sup>. In addition, the vagal nerve serves as an essential transmitter of inflammatory signals in immune-to-neuronal communication<sup>48-50</sup>. Afferent fibers of the vagal nerve relay information from viscera to the nucleus tractus solitaries in the brainstem, where it 'senses' pro-inflammatory cytokines such as IL-1, IL-6, and TNF- $\alpha$ . Information is then projected to the parvocellular zone of the paraventricular nucleus of the hypothalamus, and therefore comparison of functional alterations in the CNS and circulating levels of pro-inflammatory cytokines may provide evidence of an existing association. Some limitations about the study should be discussed. Firstly, the patient group is very heterogeneous, they may suffer from co-morbidities and may receive other pharmacological therapies, which may bias the results and consequently makes it difficult to assess the isolated effect of the VNS treatment. Secondly, the researchers may involuntarily become unblinded since the active treatment will deliver facial contractions while this is not present during sham treatment. Thirdly, the relatively low number of patients may hamper the results including the explorative secondary outcomes; however, we eliminate the inter-individual variability because of the cross-over design. Finally, although, all the patients will be trained to use the device correctly according to manufactures' protocol, it is uncertain whether the patients will apply the device correctly.

Regarding expected outcome, we hypothesize that VNS will reduce the pain in CP patients and induce changes in pain associated brain networks as well in the autonomic, inflammatory parameters and in the sensory system. Also, we expect that the neuromodulation will improve the overall quality of life in CP patients.

## **ETHICS APPROVAL, CONSENT TO PARTICIPATE AND DISSEMINATION**

The procedures set out in this study protocol, pertaining to conduct the study in compliance with Good Clinical Practice (CPMP/ICH/135/95), designated Standard Operating Procedures, the Danish Health and Medicines Authority, the Research Ethics Committee in Denmark, and within the principles of the World Medical Association, Declaration of Helsinki amended by the 52<sup>nd</sup> General Assembly, Edinburgh, Scotland, October 2000, clarified by the General Assembly in Washington 2002, Tokyo 2004, and Seoul 2008 and Fortaleza 2013 as outlined herein.

Investigators (i.e. medical doctors) will obtain informed consent from each patient. We will conduct this study under the rules of Resolution 466/12 and Declaration of Helsinki. Data will be stored electronically in REDCap database, with secure and restricted access. Data transfer will be encrypted and any information capable of identifying individuals removed. Results gathered from this protocol will be presented at national and international conferences and will be published in peer-reviewed journals. All confidential patient data will be protected, and patient identity will not be disclosed. Further dissemination of the data set can be decided by the principal investigator.

Only researchers involved in the data collection and/or data analysis will have access to the final dataset. However, the principal investigator allows direct access to all source data and documents at monitoring, and inspection from the North Denmark Region Committee on Health Research Ethics, the Danish Health and Medicines Authority or from other countries' health authorities.

### **Trial status**

The recruitment of the study started in January 2018. As of January 2019, a total of 13 patients have completed the study.



## References

1. Muniraj T, Aslanian HR, Farrell J, Jamidar PA. Chronic pancreatitis, a comprehensive review and update. Part I: Epidemiology, etiology, risk factors, genetics, pathophysiology, and clinical features. *Disease-a-Month*. 2014;60(12):530-550. doi:10.1016/j.disamonth.2014.11.002.
2. Pham A, Forsmark C. Chronic pancreatitis: review and update of etiology, risk factors, and management. *F1000Research*. 2018;7(May):607. doi:10.12688/f1000research.12852.1.
3. Mullady DK, Yadav D, Amann ST, et al. Type of pain, pain-associated complications, quality of life, disability and resource utilisation in chronic pancreatitis: a prospective cohort study. *Gut*. 2011;60(1):77-84. doi:10.1136/gut.2010.213835.
4. Botha C, Farmer AD, Nilsson M, et al. Preliminary report: modulation of parasympathetic nervous system tone influences oesophageal pain hypersensitivity. *Gut*. 2015;64(4):611-617. doi:10.1136/gutjnl-2013-306698.
5. Frøkjær JB, Bergmann S, Brock C, et al. Modulation of vagal tone enhances gastroduodenal motility and reduces somatic pain sensitivity. *Neurogastroenterol Motil*. 2016;28(4):592-598. doi:10.1111/nmo.12760.
6. Johnson RL, Wilson CG. A review of vagus nerve stimulation as a therapeutic intervention. *J Inflamm Res*. 2018;11:203-213. doi:10.2147/JIR.S163248.
7. Frøkjær JB, Bergmann S, Brock C, et al. Modulation of vagal tone enhances gastroduodenal motility and reduces somatic pain sensitivity. *Neurogastroenterol Motil*. 2016;28(4):592-598. doi:10.1111/nmo.12760.
8. Napadow V, Edwards RR, Cahalan CM, et al. Evoked Pain Analgesia in Chronic Pelvic Pain Patients Using Respiratory-Gated Auricular Vagal Afferent Nerve Stimulation. *Pain Med (United States)*. 2012;13(6):777-789. doi:10.1111/j.1526-4637.2012.01385.x.
9. Brock C, Brock B, Aziz Q, et al. Transcutaneous cervical vagal nerve stimulation modulates cardiac vagal tone and tumor necrosis factor-alpha. *Neurogastroenterol Motil*. 2017;29(5):4-7. doi:10.1111/nmo.12999.
10. Chakravarthy K, Chaudhry H, Williams K, Christo PJ. Review of the Uses of Vagal Nerve Stimulation in Chronic Pain Management. *Curr Pain Headache Rep*. 2015;19(12). doi:10.1007/s11916-015-0528-6.
11. Frangos E, Ellrich J, Komisaruk BR. Non-invasive access to the vagus nerve central projections via electrical stimulation of the external ear: FMRI evidence in humans. *Brain Stimul*. 2015;8(3):624-636. doi:10.1016/j.brs.2014.11.018.
12. Yuan H, Silberstein SD. Vagus Nerve and Vagus Nerve Stimulation, a Comprehensive Review: Part II. *Headache*. 2016;56(2):259-266. doi:10.1111/head.12650.
13. Gaul C, Diener H-C, Silver N, et al. Non-invasive vagus nerve stimulation for PREvention and Acute treatment of chronic cluster headache (PREVA): A randomised controlled study. *Cephalalgia*. 2016;36(6):534-546. doi:10.1177/0333102415607070.
14. Moher D, Hopewell S, Schulz KF, et al. CONSORT 2010 explanation and elaboration: Updated guidelines for reporting parallel group randomised trials. *Int J Surg*. 2012. doi:10.1016/j.ijsu.2011.10.001.
15. Chan AW, Tetzlaff JM, Gøtzsche PC, et al. SPIRIT 2013 explanation and elaboration: guidance for protocols of clinical trials. *BMJ*. 2013. doi:10.1136/bmj.e7586.

- 1  
2  
3  
4 440 16. Vitória A, Araújo L De, Ribeiro V, et al. Effects of high-frequency transcranial magnetic stimulation on functional  
5 441 performance in individuals with incomplete spinal cord injury : study protocol for a randomized controlled trial. 2017:1-11.  
6 442 doi:10.1186/s13063-017-2280-1.  
7  
8  
9 443 17. Kuppuswamy A, Balasubramaniam A V, Maksimovic R, et al. Clinical Neurophysiology Action of 5 Hz repetitive  
10 444 transcranial magnetic stimulation on sensory , motor and autonomic function in human spinal cord injury. *Clin*  
11 445 *Neurophysiol.* 2011;122(12):2452-2461. doi:10.1016/j.clinph.2011.04.022.  
12  
13 446 18. Layer P, Yamamoto H, Kalthoff L, Clain JE, Bakken LJ, DiMagno EP. The different courses of early- and late-onset  
14 447 idiopathic and alcoholic chronic pancreatitis. *Gastroenterology.* 1994;107(5):1481-1487. doi:10.1016/0016-5085(94)90553-  
15 448 3.  
16  
17  
18 449 19. Strickland I, Mwamburi M, Davis S, et al. Noninvasive vagus nerve stimulation in a primary care setting: effects on quality  
19 450 of life and utilization measures in multimorbidity patients with or without primary headache. *Am J Manag Care.* 2018;24(24  
20 451 Suppl):S517-S526.  
21  
22 452 20. Grazzi L, Tassorelli C, Tommaso M De, Pierangeli G, Martelletti P. Practical and clinical utility of non-invasive vagus  
23 453 nerve stimulation ( nVNS ) for the acute treatment of migraine : a post hoc analysis of the randomized , sham-controlled ,  
24 454 double-blind PRESTO trial. 2018;1:1-9.  
25  
26  
27 455 21. Tarn J, Legg S, Mitchell S, Simon B, Ng WF. The Effects of Noninvasive Vagus Nerve Stimulation on Fatigue and Immune  
28 456 Responses in Patients With Primary Sjögren's Syndrome. *Neuromodulation.* 2018;2018. doi:10.1111/ner.12879.  
29  
30 457 22. A.D. N, J.C.A. M, E. T, M.H. R, P.J. G. Initial use of a novel noninvasive vagus nerve stimulator for cluster headache  
31 458 treatment. *Neurology.* 2015;84(12):1249-1253.  
32  
33 459 23. De Icco R, Martinelli D, Bitetto V, et al. Peripheral vagal nerve stimulation modulates the nociceptive withdrawal reflex in  
34 460 healthy subjects: A randomized, cross-over, sham-controlled study. *Cephalalgia.* 2018;38(10):1658-1664.  
35 461 doi:10.1177/0333102417742347.  
36  
37  
38 462 24. Silberstein SD, Mechtler LL, Kudrow DB, et al. Noninvasive Vagus Nerve Stimulation for the ACute Treatment of  
39 463 Cluster Headache: Findings From the Randomized, Double-Blind, Sham-Controlled ACT1 Study. *Headache.*  
40 464 2016;56(8):1317-1332. doi:10.1111/head.12896.  
41  
42  
43 465 25. Use I, Risks P. Instructions for Use for gammaCore ® -S 1. :1-28.  
44  
45 466 26. Fayers P. M. et al. EORTC QLQ-C30 Scoring Manual The EORTC QLQ-C30 Introduction. *EORTC QLQ-C30 Scoring*  
46 467 *Man EORTC QLQ-C30 Introd.* 2001;30:1-67. doi:D/2001/6136/001.  
47  
48 468 27. Cleeland CS. Brief Pain Inventory (BPI). *Cleel CS MD Anderson Cancer Cent.* 1982;1100:6. doi:10.1007/978-1-4419-9893-  
49 469 4\_13.  
50  
51 470 28. Farrar JT, Young JP, LaMoreaux L, Werth JL, Poole RM. Clinical importance of changes in chronic pain intensity  
52 471 measured on an 11-point numerical pain rating scale. *Pain.* 2001;94(2):149-158. doi:10.1016/S0304-3959(01)00349-9.  
53  
54 472 29. Arendt-Nielsen L, Morlion B, Perrot S, et al. Assessment and manifestation of central sensitisation across different chronic  
55 473 pain conditions. *Eur J Pain (United Kingdom).* 2018;22(2):216-241. doi:10.1002/ejp.1140.  
56  
57 474 30. Olesen SS, Bouwense SAW, Wildersmith OHG, Van Goor H, Drewes AM. Pregabalin reduces pain in patients with chronic  
58 475 pancreatitis in a randomized, controlled trial. *Gastroenterology.* 2011. doi:10.1053/j.gastro.2011.04.003.  
59  
60

- 1  
2  
3  
4 476 31. Kennedy DL, Kemp HI, Ridout D, Yarnitsky D, Rice ASC. Reliability of conditioned pain modulation: A systematic  
5 477 review. *Pain*. 2016;157(11):2410-2419. doi:10.1097/j.pain.0000000000000689.  
6  
7 478 32. Yarnitsky D, Bouhassira D, Drewes AM, et al. Recommendations on practice of conditioned pain modulation (CPM)  
8 479 testing. *Eur J Pain (United Kingdom)*. 2015;19(6):805-806. doi:10.1002/ejp.605.  
9  
10 480 33. Farmer AD, Coen SJ, Kano M, et al. Normal values and reproducibility of the real-time index of vagal tone in healthy  
11 481 humans: a multi-center study. *Ann Gastroenterol Q Publ Hell Soc Gastroenterol*. 2014;27(4):362-368.  
12  
13  
14 482 34. Trial C, Olesen SS, Bouwense SAW, Smith OHGW, Goor HVAN. CLINICAL — PANCREAS Pregabalin Reduces Pain in  
15 483 Patients With Chronic Pancreatitis in a. *YGAST*. 2011;141(2):536-543. doi:10.1053/j.gastro.2011.04.003.  
16  
17 484 35. College Station TSL. StataCorp. 2015. *Stata Stat Softw Release 13*. 2013.  
18  
19 485 36. Harris PA, Taylor R, Thielke R, Payne J, Gonzalez N, Conde JG. Research electronic data capture (REDCap)-A metadata-  
20 486 driven methodology and workflow process for providing translational research informatics support. *J Biomed Inform*. 2009.  
21 487 doi:10.1016/j.jbi.2008.08.010.  
22  
23  
24 488 37. Hansen TM, Olesen AE, Simonsen CW, Drewes AM, Frøkjær JB. Cingulate metabolites during pain and morphine  
25 489 treatment as assessed by magnetic resonance spectroscopy. *J Pain Res*. 2014;7:269-276. doi:10.2147/JPR.S61193.  
26  
27 490 38. Dimcevski G, Sami SAK, Funch-Jensen P, et al. {A figure is presented}Pain in Chronic Pancreatitis: The Role of  
28 491 Reorganization in the Central Nervous System. *Gastroenterology*. 2007;132(4):1546-1556.  
29 492 doi:10.1053/j.gastro.2007.01.037.  
30  
31  
32 493 39. Frøkjær JB, Olesen SS, Gram M, et al. Altered brain microstructure assessed by diffusion tensor imaging in patients with  
33 494 chronic pancreatitis. *Gut*. 2011;60(11):1554-1562. doi:10.1136/gut.2010.236620.  
34  
35 495 40. Frøkjær JB, Bouwense SAW, Olesen SS, et al. Reduced Cortical Thickness of Brain Areas Involved in Pain Processing in  
36 496 Patients With Chronic Pancreatitis. *Clin Gastroenterol Hepatol*. 2012;10(4):434-438. doi:10.1016/j.cgh.2011.11.024.  
37  
38 497 41. Lelic D, Olesen SS, Graversen C, Brock C, Valeriani M, Drewes AM. Electrophysiology as a tool to unravel the origin of  
39 498 pancreatic pain. *World J Gastrointest Pathophysiol*. 2014;5(1):33-39. doi:10.4291/wjgp.v5.i1.33.  
40  
41 499 42. Muthulingam J, Olesen SS, Hansen TM, et al. Progression of Structural Brain Changes in Patients With Chronic Pancreatitis  
42 500 and Its Association to Chronic Pain: A 7-Year Longitudinal Follow-up Study. *Pancreas*. 2018;47(10):1267-1276.  
43 501 doi:10.1097/MPA.0000000000001151.  
44  
45  
46 502 43. Apkarian A V, Hashmi JA, Baliki MN. Pain and the brain: Specificity and plasticity of the brain in clinical chronic pain.  
47 503 *Pain*. 2011;152(3 Suppl):S49-64. doi:10.1016/j.pain.2010.11.010.  
48  
49 504 44. Garcia RG, Lin RL, Lee J, et al. Modulation of brainstem activity and connectivity by respiratory-gated auricular vagal  
50 505 afferent nerve stimulation in migraine patients. *Pain*. 2017;158(8):1461-1472. doi:10.1097/j.pain.0000000000000930.  
51  
52 506 45. O'Connell NE, Marston L, Spencer S, et al. Non-invasive brain stimulation techniques for chronic pain. *Cochrane database*  
53 507 *Syst Rev*. 2018;3(9):CD008208. doi:10.1002/14651858.CD008208.pub2.  
54  
55  
56 508 46. Seminowicz DA, Wideman TH, Naso L, et al. Effective Treatment of Chronic Low Back Pain in Humans Reverses  
57 509 Abnormal Brain Anatomy and Function. *J Neurosci*. 2011;31(20):7540-7550. doi:10.1523/JNEUROSCI.5280-10.2011.  
58  
59 510 47. Čeko M, Shir Y, Ouellet JA, Ware MA, Stone LS, Seminowicz DA. Partial recovery of abnormal insula and dorsolateral  
60

1  
2  
3  
4  
5  
6  
7  
8  
9  
10  
11  
12  
13  
14  
15  
16  
17  
18  
19  
20  
21  
22  
23  
24  
25  
26  
27  
28  
29  
30  
31  
32  
33  
34  
35  
36  
37  
38  
39  
40  
41  
42  
43  
44  
45  
46  
47  
48  
49  
50  
51  
52  
53  
54  
55  
56  
57  
58  
59  
60

- 511 prefrontal connectivity to cognitive networks in chronic low back pain after treatment. *Hum Brain Mapp.* 2015;36(6):2075-  
512 2092. doi:10.1002/hbm.22757.
- 513 48. Bonaz B, Sinniger V, Pellissier S. Vagal tone: Effects on sensitivity, motility, and inflammation. *Neurogastroenterol Motil.*  
514 2016;28(4):455-462. doi:10.1111/nmo.12817.
- 515 49. Watkins LR, Maier SF, Goehler LE. Cytokine-to-brain communication: A review & analysis of alternative mechanisms.  
516 *Life Sci.* 1995;57(11):1011-1026. doi:10.1016/0024-3205(95)02047-M.
- 517 50. Hosoi T, Okuma Y, Matsuda T, Nomura Y. Novel pathway for LPS-induced afferent vagus nerve activation: Possible role  
518 of nodose ganglion. *Auton Neurosci Basic Clin.* 2005;120(1-2):104-107. doi:10.1016/j.autneu.2004.11.012.

For peer review only

## Legends for illustrations

- Figure 1: Mode of action of transcutaneous vagal nerve stimulation (t-VNS). (1) Pain arises in the periphery e.g. pancreas and a signal is sent to the spinal cord. This leads to ascending activation of the spinal neurons (2). In the brain, pain is processed in higher cortical centres (3). T-VNS, it is expected to block the perception of pain in the cerebral cortex, by stimulating nucleus tractus solitarius and thereby decrease glutamate level. Simultaneously, the net-descending inhibition will be activated as a result of top-down input from cortex and the limbic system (4).
- Figure 2: Schematic flowchart of the interventional study design enabling comparison of the modulatory effect to self-administered of transcutaneous vagal nerve stimulation (t-VNS) in patients with chronic pancreatitis. Chronic pancreatitis patients will be randomly assigned to one of two double blinded treatments: (1) two weeks of t-VNS, two weeks of wash-out, and two weeks of sham treatment; or (2) two weeks of sham treatment, two weeks of washout, and two weeks of t-VNS. Evaluation of the two treatments will be assessed by collecting pain diary, pain questionnaires, MRI scan, blood sample, cardiac vagal tone, and pain assessments. QST=Quantitative sensory testing. CVT=Cardiac vagal tone. MRI=Magnetic resonance imaging.
- Figure 3: SPIRIT Figure.

555 **Table 1: Trial characteristics based on WHO Trial Registration Data Set**

| <b>Data category</b>                          | <b>Trial Information</b>                                                                                                                                                                                                                                                                                                                                                                                                                                                                                                                                                                                                                                                                                                                                                                                                                                                                                                                                                                                                                                                                                                                                                                                                                                                                                                                                                                                                                                                                                       |
|-----------------------------------------------|----------------------------------------------------------------------------------------------------------------------------------------------------------------------------------------------------------------------------------------------------------------------------------------------------------------------------------------------------------------------------------------------------------------------------------------------------------------------------------------------------------------------------------------------------------------------------------------------------------------------------------------------------------------------------------------------------------------------------------------------------------------------------------------------------------------------------------------------------------------------------------------------------------------------------------------------------------------------------------------------------------------------------------------------------------------------------------------------------------------------------------------------------------------------------------------------------------------------------------------------------------------------------------------------------------------------------------------------------------------------------------------------------------------------------------------------------------------------------------------------------------------|
| Primary Registry and Trial Identifying Number | ClinicalTrials.gov (NCT03357029)                                                                                                                                                                                                                                                                                                                                                                                                                                                                                                                                                                                                                                                                                                                                                                                                                                                                                                                                                                                                                                                                                                                                                                                                                                                                                                                                                                                                                                                                               |
| Date of Registration in Primary Registry      | November 29, 2017                                                                                                                                                                                                                                                                                                                                                                                                                                                                                                                                                                                                                                                                                                                                                                                                                                                                                                                                                                                                                                                                                                                                                                                                                                                                                                                                                                                                                                                                                              |
| Secondary Identifying Numbers                 | North Denmark Region Committee on Health Research Ethics: protocol number N-20170023                                                                                                                                                                                                                                                                                                                                                                                                                                                                                                                                                                                                                                                                                                                                                                                                                                                                                                                                                                                                                                                                                                                                                                                                                                                                                                                                                                                                                           |
| Source(s) of Monetary or Material Support     | The study is conducted as a sponsor-investigator initiated study with financial support from Independent Research Fund Denmark (DFR – 7016-00073).                                                                                                                                                                                                                                                                                                                                                                                                                                                                                                                                                                                                                                                                                                                                                                                                                                                                                                                                                                                                                                                                                                                                                                                                                                                                                                                                                             |
| Primary Sponsor                               | JBF                                                                                                                                                                                                                                                                                                                                                                                                                                                                                                                                                                                                                                                                                                                                                                                                                                                                                                                                                                                                                                                                                                                                                                                                                                                                                                                                                                                                                                                                                                            |
| Secondary Sponsor                             | NA                                                                                                                                                                                                                                                                                                                                                                                                                                                                                                                                                                                                                                                                                                                                                                                                                                                                                                                                                                                                                                                                                                                                                                                                                                                                                                                                                                                                                                                                                                             |
| Contact for Public Queries                    | JBF                                                                                                                                                                                                                                                                                                                                                                                                                                                                                                                                                                                                                                                                                                                                                                                                                                                                                                                                                                                                                                                                                                                                                                                                                                                                                                                                                                                                                                                                                                            |
| Contact for Scientific Queries                | JBF                                                                                                                                                                                                                                                                                                                                                                                                                                                                                                                                                                                                                                                                                                                                                                                                                                                                                                                                                                                                                                                                                                                                                                                                                                                                                                                                                                                                                                                                                                            |
| Public title                                  | Neuromodulation in Patients with Painful Chronic Pancreatitis                                                                                                                                                                                                                                                                                                                                                                                                                                                                                                                                                                                                                                                                                                                                                                                                                                                                                                                                                                                                                                                                                                                                                                                                                                                                                                                                                                                                                                                  |
| Scientific title                              | Study protocol for a randomized double-blinded, sham-controlled, prospective, cross-over clinical trial of vagal neuromodulation for pain treatment in patients with chronic pancreatitis                                                                                                                                                                                                                                                                                                                                                                                                                                                                                                                                                                                                                                                                                                                                                                                                                                                                                                                                                                                                                                                                                                                                                                                                                                                                                                                      |
| Country of recruitment                        | Denmark                                                                                                                                                                                                                                                                                                                                                                                                                                                                                                                                                                                                                                                                                                                                                                                                                                                                                                                                                                                                                                                                                                                                                                                                                                                                                                                                                                                                                                                                                                        |
| Healthy conditions(s) or problems studied     | Chronic pancreatitis                                                                                                                                                                                                                                                                                                                                                                                                                                                                                                                                                                                                                                                                                                                                                                                                                                                                                                                                                                                                                                                                                                                                                                                                                                                                                                                                                                                                                                                                                           |
| Interventions                                 | Two-week transcutaneous vagal nerve stimulation (t-VNS) on the cervical vagal area (Self-administering vagal nerve stimulation bilaterally to the cervical vagal area, the times per day).                                                                                                                                                                                                                                                                                                                                                                                                                                                                                                                                                                                                                                                                                                                                                                                                                                                                                                                                                                                                                                                                                                                                                                                                                                                                                                                     |
| Key inclusion and exclusion criteria          | Inclusion criteria: Age $\geq 18$ years; Patients with a diagnosis of CP diagnosed using the Mayo Clinic diagnostic criteria.; The participants must be able to read and understand Danish.; The patients must suffer from chronic abdominal pain characteristic for CP, meet the criteria for chronic pain (pain $\geq 3$ days per week in at least 3 months) and must consider their pain as insufficiently treated with their usual analgesic treatment. ; Personally, signed and dated informed consent document and the Power of attorney document; Patients willing and able to comply with the scheduled visits, treatment plan, laboratory tests and other trial procedures. Exclusion criteria: Patients with any clinically significant abnormalities that in the opinion of the investigator may increase the risk associated with trial participation or may interfere with the interpretation of the trial results. ; Alcohol dependence; Illegal drug dependencies; Participating in another study where investigational drug is used. ; Patients must not suffer from painful conditions other than CP that make them unable to distinguish the pain associated with CP from chronic pain of other origin.; Cardiovascular diseases ; Low blood pressure $< 100/60$ , Not able to understand or follow the instructions, ; Any condition with elevated intracranial pressure.; Female patients who are pregnant; Contraindications for MRI; Previous surgery on vagal nerve.; Known neuropathy. |
| Study type                                    | Interventional allocation: randomized<br>Masking: double-blind<br>Assignment: cross-over<br>Primary purpose: treatment                                                                                                                                                                                                                                                                                                                                                                                                                                                                                                                                                                                                                                                                                                                                                                                                                                                                                                                                                                                                                                                                                                                                                                                                                                                                                                                                                                                         |

|                            |                                                                                                                                             |
|----------------------------|---------------------------------------------------------------------------------------------------------------------------------------------|
| Date of first enrolment    | January 2018                                                                                                                                |
| Target sample size         | 21                                                                                                                                          |
| Recruitment status         | Recruiting                                                                                                                                  |
| Primary outcome(s)         | Change in NRS scores in pain diary                                                                                                          |
| Key Secondary outcomes (s) | Assessment of the effect of t-VNS on A) resting state brain function assessed by MRI, and B) brain metabolites assessed by MR spectroscopy. |

For peer review only



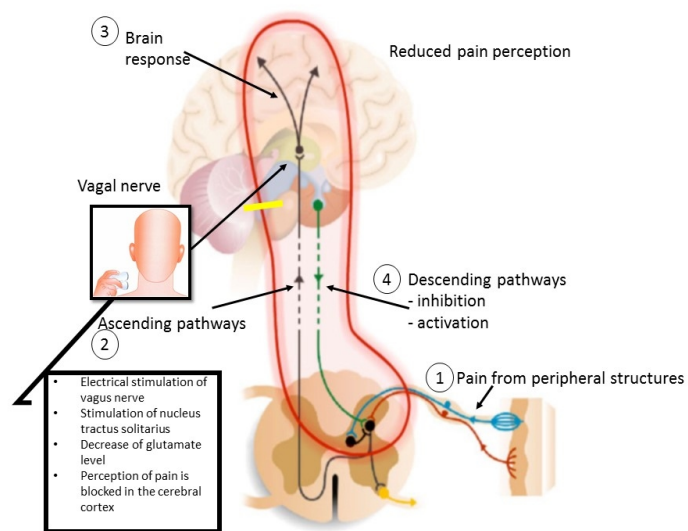

Figure 1: Mode of action of transcutaneous vagal nerve stimulation (t-VNS). (1) Pain arises in the periphery e.g. pancreas and a signal is sent to the spinal cord. This leads to ascending activation of the spinal neurons (2). In the brain, pain is processed in higher cortical centres (3). T-VNS, it is expected to block the perception of pain in the cerebral cortex, by stimulating nucleus tractus solitarius and thereby decrease glutamate level. Simultaneously, the net-descending inhibition will be activated as a result of top-down input from cortex and the limbic system (4).

338x190mm (96 x 96 DPI)





Figure 2: Schematic flowchart of the interventional study design enabling comparison of the modulatory effect to self-administered of transcutaneous vagal nerve stimulation (t-VNS) in patients with chronic pancreatitis. Chronic pancreatitis patients will be randomly assigned to one of two double blinded treatments: (1) two weeks of t-VNS, two weeks of wash-out, and two weeks of sham treatment; or (2) two weeks of sham treatment, two weeks of washout, and two weeks of t-VNS. Evaluation of the two treatments will be assessed by collecting pain diary, pain questionnaires, MRI scan, blood sample, cardiac vagal tone, and pain assessments. QST=Quantitative sensory testing. CVT=Cardiac vagal tone. MRI=Magnetic resonance imaging.

220x253mm (300 x 300 DPI)

|                                      | STUDY PERIOD          |                       |                 |       |       |       |       |       |           |
|--------------------------------------|-----------------------|-----------------------|-----------------|-------|-------|-------|-------|-------|-----------|
|                                      | Enrolment & screening | Baseline & allocation | Post-allocation |       |       |       |       |       | Follow-up |
| TIMEPOINT**                          | $T_{-1}$              | 0                     | $T_1$           | $T_2$ | $T_3$ | $T_4$ | $T_5$ | $T_6$ | $T_7$     |
| Week                                 | 0                     | 1                     | 2               | 3     | 4     | 5     | 6     | 7     | 8         |
| <b>ENROLMENT:</b>                    |                       |                       |                 |       |       |       |       |       |           |
| Eligibility screen                   | X                     |                       |                 |       |       |       |       |       |           |
| Informed consent                     | X                     |                       |                 |       |       |       |       |       |           |
| Allocation                           |                       | X                     |                 |       |       |       |       |       |           |
| <b>INTERVENTIONS:</b>                |                       |                       |                 |       |       |       |       |       |           |
| <i>[transcutaneous VNS (active)]</i> |                       |                       | X               | X     |       |       | X     | X     |           |
| <i>[Sham treatment]</i>              |                       |                       | X               | X     |       |       | X     | X     |           |
|                                      |                       |                       |                 |       |       |       |       |       |           |
| <b>ASSESSMENTS:</b>                  |                       |                       |                 |       |       |       |       |       |           |
| <i>Pain diary</i>                    |                       | X                     | X               | X     | X     | X     | X     | X     | X         |
| <i>QORTC-QLQ-C30 questionnaire</i>   |                       |                       | X               | X     |       |       | X     | X     |           |
| <i>BPI-SF Questionnaire</i>          |                       |                       | X               | X     |       |       | X     | X     |           |
| <i>PGIC questionnaire</i>            |                       |                       |                 | X     |       |       |       | X     |           |
| <i>MRI</i>                           |                       |                       | X               | X     |       |       | X     | X     |           |
| <i>CVT</i>                           |                       |                       | X               | X     |       |       | X     | X     |           |
| <i>Blood samples</i>                 |                       |                       | X               | X     |       |       | X     | X     |           |
| <i>QST</i>                           |                       |                       | X               | X     |       |       | X     | X     |           |
| <i>[Adverse events]</i>              |                       |                       | X               | X     | X     |       | X     | X     |           |

Figure 3: SPIRIT Figure.

87x104mm (300 x 300 DPI)



SPIRIT 2013 Checklist: Recommended items to address in a clinical trial protocol and related documents\*

| Section/item                      | Item No | Description                                                                                                                                                                                                                                                                              | Addressed on page number |
|-----------------------------------|---------|------------------------------------------------------------------------------------------------------------------------------------------------------------------------------------------------------------------------------------------------------------------------------------------|--------------------------|
| <b>Administrative information</b> |         |                                                                                                                                                                                                                                                                                          |                          |
| Title                             | 1       | Descriptive title identifying the study design, population, interventions, and, if applicable, trial acronym                                                                                                                                                                             | ___1___                  |
| Trial registration                | 2a      | Trial identifier and registry name. If not yet registered, name of intended registry                                                                                                                                                                                                     | ___2___                  |
|                                   | 2b      | All items from the World Health Organization Trial Registration Data Set                                                                                                                                                                                                                 | __Table 1__              |
| Protocol version                  | 3       | Date and version identifier                                                                                                                                                                                                                                                              | ___1___                  |
| Funding                           | 4       | Sources and types of financial, material, and other support                                                                                                                                                                                                                              | ___1___                  |
| Roles and responsibilities        | 5a      | Names, affiliations, and roles of protocol contributors                                                                                                                                                                                                                                  | ___1___                  |
|                                   | 5b      | Name and contact information for the trial sponsor                                                                                                                                                                                                                                       | ___1___                  |
|                                   | 5c      | Role of study sponsor and funders, if any, in study design; collection, management, analysis, and interpretation of data; writing of the report; and the decision to submit the report for publication, including whether they will have ultimate authority over any of these activities | ___1___                  |
|                                   | 5d      | Composition, roles, and responsibilities of the coordinating centre, steering committee, endpoint adjudication committee, data management team, and other individuals or groups overseeing the trial, if applicable (see Item 21a for data monitoring committee)                         | Not applicable           |

|    |                                                           |     |                                                                                                               |                  |
|----|-----------------------------------------------------------|-----|---------------------------------------------------------------------------------------------------------------|------------------|
| 1  | <b>Introduction</b>                                       |     |                                                                                                               |                  |
| 2  |                                                           |     |                                                                                                               |                  |
| 3  | Background and                                            | 6a  | Description of research question and justification for undertaking the trial, including summary of relevant   | __4-5, 7-8, 11__ |
| 4  | rationale                                                 |     | studies (published and unpublished) examining benefits and harms for each intervention                        |                  |
| 5  |                                                           |     |                                                                                                               |                  |
| 6  |                                                           | 6b  | Explanation for choice of comparators                                                                         | __7-9__          |
| 7  |                                                           |     |                                                                                                               |                  |
| 8  | Objectives                                                | 7   | Specific objectives or hypotheses                                                                             | __4-5__          |
| 9  |                                                           |     |                                                                                                               |                  |
| 10 | Trial design                                              | 8   | Description of trial design including type of trial (eg, parallel group, crossover, factorial, single group), |                  |
| 11 |                                                           |     | allocation ratio, and framework (eg, superiority, equivalence, noninferiority, exploratory)                   | __6__            |
| 12 |                                                           |     |                                                                                                               |                  |
| 13 |                                                           |     |                                                                                                               |                  |
| 14 | <b>Methods: Participants, interventions, and outcomes</b> |     |                                                                                                               |                  |
| 15 |                                                           |     |                                                                                                               |                  |
| 16 | Study setting                                             | 9   | Description of study settings (eg, community clinic, academic hospital) and list of countries where data will | __6__            |
| 17 |                                                           |     | be collected. Reference to where list of study sites can be obtained                                          |                  |
| 18 |                                                           |     |                                                                                                               |                  |
| 19 | Eligibility criteria                                      | 10  | Inclusion and exclusion criteria for participants. If applicable, eligibility criteria for study centres and  | __6-7__          |
| 20 |                                                           |     | individuals who will perform the interventions (eg, surgeons, psychotherapists)                               |                  |
| 21 |                                                           |     |                                                                                                               |                  |
| 22 | Interventions                                             | 11a | Interventions for each group with sufficient detail to allow replication, including how and when they will be | __7-8__          |
| 23 |                                                           |     | administered                                                                                                  |                  |
| 24 |                                                           |     |                                                                                                               |                  |
| 25 |                                                           | 11b | Criteria for discontinuing or modifying allocated interventions for a given trial participant (eg, drug dose  | __7__            |
| 26 |                                                           |     | change in response to harms, participant request, or improving/worsening disease)                             |                  |
| 27 |                                                           |     |                                                                                                               |                  |
| 28 |                                                           | 11c | Strategies to improve adherence to intervention protocols, and any procedures for monitoring adherence        | __8__            |
| 29 |                                                           |     | (eg, drug tablet return, laboratory tests)                                                                    |                  |
| 30 |                                                           |     |                                                                                                               |                  |
| 31 |                                                           | 11d | Relevant concomitant care and interventions that are permitted or prohibited during the trial                 | __7__            |
| 32 |                                                           |     |                                                                                                               |                  |
| 33 | Outcomes                                                  | 12  | Primary, secondary, and other outcomes, including the specific measurement variable (eg, systolic blood       | __9-11__         |
| 34 |                                                           |     | pressure), analysis metric (eg, change from baseline, final value, time to event), method of aggregation (eg, |                  |
| 35 |                                                           |     | median, proportion), and time point for each outcome. Explanation of the clinical relevance of chosen         |                  |
| 36 |                                                           |     | efficacy and harm outcomes is strongly recommended                                                            |                  |
| 37 |                                                           |     |                                                                                                               |                  |
| 38 | Participant timeline                                      | 13  | Time schedule of enrolment, interventions (including any run-ins and washouts), assessments, and visits for   | __Figure 2 & 3__ |
| 39 |                                                           |     | participants. A schematic diagram is highly recommended (see Figure)                                          |                  |
| 40 |                                                           |     |                                                                                                               |                  |
| 41 |                                                           |     |                                                                                                               |                  |
| 42 |                                                           |     |                                                                                                               |                  |
| 43 |                                                           |     |                                                                                                               |                  |
| 44 |                                                           |     |                                                                                                               |                  |
| 45 |                                                           |     |                                                                                                               |                  |
| 46 |                                                           |     |                                                                                                               |                  |

|    |                                                                     |     |                                                                                                                                                                                                                                                                                                                                                                                                              |                |
|----|---------------------------------------------------------------------|-----|--------------------------------------------------------------------------------------------------------------------------------------------------------------------------------------------------------------------------------------------------------------------------------------------------------------------------------------------------------------------------------------------------------------|----------------|
| 1  | Sample size                                                         | 14  | Estimated number of participants needed to achieve study objectives and how it was determined, including clinical and statistical assumptions supporting any sample size calculations                                                                                                                                                                                                                        | __11__         |
| 2  |                                                                     |     |                                                                                                                                                                                                                                                                                                                                                                                                              |                |
| 3  |                                                                     |     |                                                                                                                                                                                                                                                                                                                                                                                                              |                |
| 4  | Recruitment                                                         | 15  | Strategies for achieving adequate participant enrolment to reach target sample size                                                                                                                                                                                                                                                                                                                          | __6__          |
| 5  |                                                                     |     |                                                                                                                                                                                                                                                                                                                                                                                                              |                |
| 6  |                                                                     |     |                                                                                                                                                                                                                                                                                                                                                                                                              |                |
| 7  | <b>Methods: Assignment of interventions (for controlled trials)</b> |     |                                                                                                                                                                                                                                                                                                                                                                                                              |                |
| 8  | Allocation:                                                         |     |                                                                                                                                                                                                                                                                                                                                                                                                              |                |
| 9  |                                                                     |     |                                                                                                                                                                                                                                                                                                                                                                                                              |                |
| 10 | Sequence generation                                                 | 16a | Method of generating the allocation sequence (eg, computer-generated random numbers), and list of any factors for stratification. To reduce predictability of a random sequence, details of any planned restriction (eg, blocking) should be provided in a separate document that is unavailable to those who enrol participants or assign interventions                                                     | __8__          |
| 11 |                                                                     |     |                                                                                                                                                                                                                                                                                                                                                                                                              |                |
| 12 |                                                                     |     |                                                                                                                                                                                                                                                                                                                                                                                                              |                |
| 13 |                                                                     |     |                                                                                                                                                                                                                                                                                                                                                                                                              |                |
| 14 |                                                                     |     |                                                                                                                                                                                                                                                                                                                                                                                                              |                |
| 15 |                                                                     |     |                                                                                                                                                                                                                                                                                                                                                                                                              |                |
| 16 | Allocation concealment mechanism                                    | 16b | Mechanism of implementing the allocation sequence (eg, central telephone; sequentially numbered, opaque, sealed envelopes), describing any steps to conceal the sequence until interventions are assigned                                                                                                                                                                                                    | __8__          |
| 17 |                                                                     |     |                                                                                                                                                                                                                                                                                                                                                                                                              |                |
| 18 |                                                                     |     |                                                                                                                                                                                                                                                                                                                                                                                                              |                |
| 19 |                                                                     |     |                                                                                                                                                                                                                                                                                                                                                                                                              |                |
| 20 | Implementation                                                      | 16c | Who will generate the allocation sequence, who will enrol participants, and who will assign participants to interventions                                                                                                                                                                                                                                                                                    | __8__          |
| 21 |                                                                     |     |                                                                                                                                                                                                                                                                                                                                                                                                              |                |
| 22 |                                                                     |     |                                                                                                                                                                                                                                                                                                                                                                                                              |                |
| 23 |                                                                     |     |                                                                                                                                                                                                                                                                                                                                                                                                              |                |
| 24 | Blinding (masking)                                                  | 17a | Who will be blinded after assignment to interventions (eg, trial participants, care providers, outcome assessors, data analysts), and how                                                                                                                                                                                                                                                                    | __8,9__        |
| 25 |                                                                     |     |                                                                                                                                                                                                                                                                                                                                                                                                              |                |
| 26 |                                                                     |     |                                                                                                                                                                                                                                                                                                                                                                                                              |                |
| 27 |                                                                     | 17b | If blinded, circumstances under which unblinding is permissible, and procedure for revealing a participant's allocated intervention during the trial                                                                                                                                                                                                                                                         | __9__          |
| 28 |                                                                     |     |                                                                                                                                                                                                                                                                                                                                                                                                              |                |
| 29 |                                                                     |     |                                                                                                                                                                                                                                                                                                                                                                                                              |                |
| 30 |                                                                     |     |                                                                                                                                                                                                                                                                                                                                                                                                              |                |
| 31 | <b>Methods: Data collection, management, and analysis</b>           |     |                                                                                                                                                                                                                                                                                                                                                                                                              |                |
| 32 |                                                                     |     |                                                                                                                                                                                                                                                                                                                                                                                                              |                |
| 33 | Data collection methods                                             | 18a | Plans for assessment and collection of outcome, baseline, and other trial data, including any related processes to promote data quality (eg, duplicate measurements, training of assessors) and a description of study instruments (eg, questionnaires, laboratory tests) along with their reliability and validity, if known. Reference to where data collection forms can be found, if not in the protocol | __7-12__       |
| 34 |                                                                     |     |                                                                                                                                                                                                                                                                                                                                                                                                              |                |
| 35 |                                                                     |     |                                                                                                                                                                                                                                                                                                                                                                                                              |                |
| 36 |                                                                     |     |                                                                                                                                                                                                                                                                                                                                                                                                              |                |
| 37 |                                                                     |     |                                                                                                                                                                                                                                                                                                                                                                                                              |                |
| 38 |                                                                     |     |                                                                                                                                                                                                                                                                                                                                                                                                              |                |
| 39 |                                                                     | 18b | Plans to promote participant retention and complete follow-up, including list of any outcome data to be collected for participants who discontinue or deviate from intervention protocols                                                                                                                                                                                                                    | Not applicable |
| 40 |                                                                     |     |                                                                                                                                                                                                                                                                                                                                                                                                              |                |
| 41 |                                                                     |     |                                                                                                                                                                                                                                                                                                                                                                                                              |                |
| 42 |                                                                     |     |                                                                                                                                                                                                                                                                                                                                                                                                              |                |
| 43 |                                                                     |     |                                                                                                                                                                                                                                                                                                                                                                                                              |                |
| 44 |                                                                     |     |                                                                                                                                                                                                                                                                                                                                                                                                              |                |
| 45 |                                                                     |     |                                                                                                                                                                                                                                                                                                                                                                                                              |                |
| 46 |                                                                     |     |                                                                                                                                                                                                                                                                                                                                                                                                              |                |

|    |                                 |     |                                                                                                                                                                                                                                                                                                                                       |                |
|----|---------------------------------|-----|---------------------------------------------------------------------------------------------------------------------------------------------------------------------------------------------------------------------------------------------------------------------------------------------------------------------------------------|----------------|
| 1  | Data management                 | 19  | Plans for data entry, coding, security, and storage, including any related processes to promote data quality (eg, double data entry; range checks for data values). Reference to where details of data management procedures can be found, if not in the protocol                                                                     | ___11,12___    |
| 2  |                                 |     |                                                                                                                                                                                                                                                                                                                                       |                |
| 3  |                                 |     |                                                                                                                                                                                                                                                                                                                                       |                |
| 4  |                                 |     |                                                                                                                                                                                                                                                                                                                                       |                |
| 5  | Statistical methods             | 20a | Statistical methods for analysing primary and secondary outcomes. Reference to where other details of the statistical analysis plan can be found, if not in the protocol                                                                                                                                                              | ___12___       |
| 6  |                                 |     |                                                                                                                                                                                                                                                                                                                                       |                |
| 7  |                                 |     |                                                                                                                                                                                                                                                                                                                                       |                |
| 8  |                                 | 20b | Methods for any additional analyses (eg, subgroup and adjusted analyses)                                                                                                                                                                                                                                                              | Not applicable |
| 9  |                                 |     |                                                                                                                                                                                                                                                                                                                                       |                |
| 10 |                                 | 20c | Definition of analysis population relating to protocol non-adherence (eg, as randomised analysis), and any statistical methods to handle missing data (eg, multiple imputation)                                                                                                                                                       | ___12___       |
| 11 |                                 |     |                                                                                                                                                                                                                                                                                                                                       |                |
| 12 |                                 |     |                                                                                                                                                                                                                                                                                                                                       |                |
| 13 |                                 |     |                                                                                                                                                                                                                                                                                                                                       |                |
| 14 | <b>Methods: Monitoring</b>      |     |                                                                                                                                                                                                                                                                                                                                       |                |
| 15 |                                 |     |                                                                                                                                                                                                                                                                                                                                       |                |
| 16 | Data monitoring                 | 21a | Composition of data monitoring committee (DMC); summary of its role and reporting structure; statement of whether it is independent from the sponsor and competing interests; and reference to where further details about its charter can be found, if not in the protocol. Alternatively, an explanation of why a DMC is not needed | ___12___       |
| 17 |                                 |     |                                                                                                                                                                                                                                                                                                                                       |                |
| 18 |                                 |     |                                                                                                                                                                                                                                                                                                                                       |                |
| 19 |                                 |     |                                                                                                                                                                                                                                                                                                                                       |                |
| 20 |                                 |     |                                                                                                                                                                                                                                                                                                                                       |                |
| 21 |                                 |     |                                                                                                                                                                                                                                                                                                                                       |                |
| 22 |                                 | 21b | Description of any interim analyses and stopping guidelines, including who will have access to these interim results and make the final decision to terminate the trial                                                                                                                                                               | ___12___       |
| 23 |                                 |     |                                                                                                                                                                                                                                                                                                                                       |                |
| 24 |                                 |     |                                                                                                                                                                                                                                                                                                                                       |                |
| 25 | Harms                           | 22  | Plans for collecting, assessing, reporting, and managing solicited and spontaneously reported adverse events and other unintended effects of trial interventions or trial conduct                                                                                                                                                     | ___12___       |
| 26 |                                 |     |                                                                                                                                                                                                                                                                                                                                       |                |
| 27 |                                 |     |                                                                                                                                                                                                                                                                                                                                       |                |
| 28 | Auditing                        | 23  | Frequency and procedures for auditing trial conduct, if any, and whether the process will be independent from investigators and the sponsor                                                                                                                                                                                           | Not applicable |
| 29 |                                 |     |                                                                                                                                                                                                                                                                                                                                       |                |
| 30 |                                 |     |                                                                                                                                                                                                                                                                                                                                       |                |
| 31 |                                 |     |                                                                                                                                                                                                                                                                                                                                       |                |
| 32 | <b>Ethics and dissemination</b> |     |                                                                                                                                                                                                                                                                                                                                       |                |
| 33 |                                 |     |                                                                                                                                                                                                                                                                                                                                       |                |
| 34 | Research ethics approval        | 24  | Plans for seeking research ethics committee/institutional review board (REC/IRB) approval                                                                                                                                                                                                                                             | ___6___        |
| 35 |                                 |     |                                                                                                                                                                                                                                                                                                                                       |                |
| 36 |                                 |     |                                                                                                                                                                                                                                                                                                                                       |                |
| 37 | Protocol amendments             | 25  | Plans for communicating important protocol modifications (eg, changes to eligibility criteria, outcomes, analyses) to relevant parties (eg, investigators, REC/IRBs, trial participants, trial registries, journals, regulators)                                                                                                      | Not applicable |
| 38 |                                 |     |                                                                                                                                                                                                                                                                                                                                       |                |
| 39 |                                 |     |                                                                                                                                                                                                                                                                                                                                       |                |
| 40 |                                 |     |                                                                                                                                                                                                                                                                                                                                       |                |
| 41 |                                 |     |                                                                                                                                                                                                                                                                                                                                       |                |
| 42 |                                 |     |                                                                                                                                                                                                                                                                                                                                       |                |
| 43 |                                 |     |                                                                                                                                                                                                                                                                                                                                       |                |
| 44 |                                 |     |                                                                                                                                                                                                                                                                                                                                       |                |
| 45 |                                 |     |                                                                                                                                                                                                                                                                                                                                       |                |
| 46 |                                 |     |                                                                                                                                                                                                                                                                                                                                       |                |

|    |                               |     |                                                                                                                                                                                                                                                                                     |                                    |
|----|-------------------------------|-----|-------------------------------------------------------------------------------------------------------------------------------------------------------------------------------------------------------------------------------------------------------------------------------------|------------------------------------|
| 1  | Consent or assent             | 26a | Who will obtain informed consent or assent from potential trial participants or authorised surrogates, and how (see Item 32)                                                                                                                                                        | ___ 14 ___                         |
| 2  |                               |     |                                                                                                                                                                                                                                                                                     |                                    |
| 3  |                               |     |                                                                                                                                                                                                                                                                                     |                                    |
| 4  |                               | 26b | Additional consent provisions for collection and use of participant data and biological specimens in ancillary studies, if applicable                                                                                                                                               | ___ 14 ___                         |
| 5  |                               |     |                                                                                                                                                                                                                                                                                     |                                    |
| 6  |                               |     |                                                                                                                                                                                                                                                                                     |                                    |
| 7  | Confidentiality               | 27  | How personal information about potential and enrolled participants will be collected, shared, and maintained in order to protect confidentiality before, during, and after the trial                                                                                                | ___ 14 ___                         |
| 8  |                               |     |                                                                                                                                                                                                                                                                                     |                                    |
| 9  |                               |     |                                                                                                                                                                                                                                                                                     |                                    |
| 10 | Declaration of interests      | 28  | Financial and other competing interests for principal investigators for the overall trial and each study site                                                                                                                                                                       | ___ 1 ___                          |
| 11 |                               |     |                                                                                                                                                                                                                                                                                     |                                    |
| 12 |                               |     |                                                                                                                                                                                                                                                                                     |                                    |
| 13 | Access to data                | 29  | Statement of who will have access to the final trial dataset, and disclosure of contractual agreements that limit such access for investigators                                                                                                                                     | ___ 14 ___                         |
| 14 |                               |     |                                                                                                                                                                                                                                                                                     |                                    |
| 15 |                               |     |                                                                                                                                                                                                                                                                                     |                                    |
| 16 |                               |     |                                                                                                                                                                                                                                                                                     |                                    |
| 17 | Ancillary and post-trial care | 30  | Provisions, if any, for ancillary and post-trial care, and for compensation to those who suffer harm from trial participation                                                                                                                                                       | ___ 14 ___                         |
| 18 |                               |     |                                                                                                                                                                                                                                                                                     |                                    |
| 19 |                               |     |                                                                                                                                                                                                                                                                                     |                                    |
| 20 | Dissemination policy          | 31a | Plans for investigators and sponsor to communicate trial results to participants, healthcare professionals, the public, and other relevant groups (eg, via publication, reporting in results databases, or other data sharing arrangements), including any publication restrictions | ___ 14 ___                         |
| 21 |                               |     |                                                                                                                                                                                                                                                                                     |                                    |
| 22 |                               |     |                                                                                                                                                                                                                                                                                     |                                    |
| 23 |                               |     |                                                                                                                                                                                                                                                                                     |                                    |
| 24 |                               | 31b | Authorship eligibility guidelines and any intended use of professional writers                                                                                                                                                                                                      | Not applicable                     |
| 25 |                               |     |                                                                                                                                                                                                                                                                                     |                                    |
| 26 |                               | 31c | Plans, if any, for granting public access to the full protocol, participant-level dataset, and statistical code                                                                                                                                                                     | Not applicable                     |
| 27 |                               |     |                                                                                                                                                                                                                                                                                     |                                    |
| 28 |                               |     |                                                                                                                                                                                                                                                                                     |                                    |
| 29 | <b>Appendices</b>             |     |                                                                                                                                                                                                                                                                                     |                                    |
| 30 |                               |     |                                                                                                                                                                                                                                                                                     |                                    |
| 31 | Informed consent materials    | 32  | Model consent form and other related documentation given to participants and authorised surrogates                                                                                                                                                                                  | See rules of the Ethical Committee |
| 32 |                               |     |                                                                                                                                                                                                                                                                                     |                                    |
| 33 |                               |     |                                                                                                                                                                                                                                                                                     |                                    |
| 34 | Biological specimens          | 33  | Plans for collection, laboratory evaluation, and storage of biological specimens for genetic or molecular analysis in the current trial and for future use in ancillary studies, if applicable                                                                                      | Not applicable                     |
| 35 |                               |     |                                                                                                                                                                                                                                                                                     |                                    |
| 36 |                               |     |                                                                                                                                                                                                                                                                                     |                                    |

\*It is strongly recommended that this checklist be read in conjunction with the SPIRIT 2013 Explanation & Elaboration for important clarification on the items. Amendments to the protocol should be tracked and dated. The SPIRIT checklist is copyrighted by the SPIRIT Group under the Creative Commons [“Attribution-NonCommercial-NoDerivs 3.0 Unported”](https://creativecommons.org/licenses/by/4.0/) license.
